# Supplementary material
Source: MDPI journal article supplement (https://www.mdpi.com/2227-9040/11/5/310)
Supplement: s1 [file s1]

Archive with 2 entries (2 files):
- List of fluorescent probes_proofread_rev.xlsx
- SI_proofread_rev.pdf
