# Supplementary material
Source: MDPI journal article supplement (https://www.mdpi.com/2227-9040/11/5/310)
Supplement: s1 [file s1 › List of fluorescent probes_proofread_rev.xlsx]

## Sheet: Name, LN, Reference No.
No.	name	LN	Reference
1	2,7,9E-BHVC,	6	18
2	2-amino-9-methylacridine	3	12, 29		Organelle	Cyto	ER	Golgi	LD	Lyso	Mito	Nuc	PM	Non
3	2-aminoacridine	3	12, 29		LN	0	1	2	3	4	5	6	7	8
4	2-Hydroxystilbamidine	8	32
5	3-amino-6-methoxyacridine	4	12, 30, 31
6	3-amino-7-methoxyacridine	4	12, 30, 32
7	3-amino-6-methoxy-9-(2-chloroethylamino)acridine	6	12, 30, 33
8	3-amino-6-methoxy-9-ethylaminoacridine	6	12, 30, 34
9	3,9-diaminoacridine	6	12, 30, 35
10	4-aminoacridine	3	12, 29
11	9-Amino-3-chloroacridine	4	12, 30
12	9-amino-4-methylacridine	4	12, 31
13	9-Aminoacridine	4	12, 32
14	9-amino-3:4-benzoacridine	3	12, 33
15	Acid fuchsin	8	13
16	Acriflavine	6	57
17	Alizarin	5	13
18	Astrazone pink FG	5	1
19	Astrazone Red 6B	5	11
20	Azur B	6	12
21	Azure A	6	12
22	Bis-N,N-dimethylacridine	8	1
23	Bixin	5	13
24	BODIPY FL C12	2	39
25	Brazilin	5	13
26	C 61	6	17
27	Celestin Blue	8	11
28	Coomassie blue RL	8	13
29	Coomassie brilliant blue R	8	13
30	Coriphosphine	6	46, 57
31	Crystal violet	6	56
32	Cyan 40	6	19
33	DAPI	6	12
34	DEAB-TO-3	6	43
35	di-8-ANEPPS	7	40
36	DiI	7	14
37	DiIC1	1	1
38	DiIC2	1	1
39	DiIC3	1	1
40	Dimethyl-pepep	6	23
41	DiO	7	14
42	DiOC14	7	1
43	DiOC2	1	1
44	DiOC3	1	1
45	Distamycin A	6	45
46	DRAQ5	6	24
47	E 144	6	25
48	E 36	6	25
49	Eosin B	5	13
50	Eosin B	5	13
51	Eosin Y	5	13
52	Ethidium	8	1
53	Ethyl Eosin	5	13
54	Evans Blue	8	15
55	F 22	6	25
56	Fast green FCF	8	13
57	FITC	8	34
58	Fluorescein	8	13
59	FM 1-43	7	14, 52
60	fura-2 salt	8	14
61	fura-C18	7	41
62	Gallein	5	13
63	Gallein	5	13
64	Hemataein	5	13
65	Hoechst 33342	6	12
66	Hydroethidine	0	14, 34
67	Indulin	8	11
68	Iodine Green	8	11
69	Janus black	5	1
70	Janus green	5	1
71	LysoTracker Red DND-99	4	14
72	Methyl Green	6	44
73	Methylene Blue	8	1
74	MitoTracker Green FM	5	14
75	Morin	5	13
76	New Fuchsin	6	12
77	Nile Red	3	15
78	Nuclear Yellow	6	1
79	octadecanoylaminofluorescein	7	42
80	oil red O	8	58, 59, 60
81	Orcein	5	11
82	Phenosafranine	8	54
83	Phloxine B	5	13
84	Pinacyanol	5	35
85	Propidium Iodide	8	12
86	Quinazarin	5	13
87	Rhodamine 123	5	1
88	Rhodamine 3B	5	11
89	Rhodamine 6G	5	11
90	Rhodamine B	5	11
91	rhodamine-DHPE	7	14, 53
92	A41B2	6	47
93	Structure 2b	6	27
94	Structure 2c	6	27
95	Structure 5a	6	28
96	Structure 5b	6	28
97	sulforhodamine b	8	55
98	TMA-DPH	7	51
99	Topotecan	6	16
100	TRITC	8	34
101	Trypan Blue	8	13
102	Umbelliferone	5	13
103	AMDA	6	16
104	Furamidine (DB75)	6	20
105	DB181	6	21
106	DB226	6	21
107	DB244	6	21
108	DB249	6	21
109	DB417	6	21
110	hexacyclic acridinium cyanine dye 9	6	22
111	FLEth	6	26
112	BAO (2,5-bis(4-aminophenyl)-1,3,4-oxadiazole)	6	48
113	Harmine	4	10
114	Chloroquine	4	10
115	Cycloguanil	4	10
116	Quinine	4	10
117	Pyrimethamine	4	10
118	EP1	0	2
119	EP2	3	2
120	EP3	3	2
121	EP4	0	2
122	EP5	3	2
123	EP6	0	2
124	EP7	0	2
125	EP8	3	2
126	EP9	8	2
127	EP10	0	2
128	EP11	0	2
129	EP12	3	2
130	EP13	3	2
131	EP14	3	2
132	EP15	3	2
133	EP17	0	2
134	EP18	0	2
135	EP19	4	2
136	EP20	3	2
137	EP21	0	2
138	EP22	0	2
139	EP23	3	2
140	EP24	3	2
141	EP25	0	2
142	EP26	3	2
143	EP27	0	2
144	EP28	0	2
145	EP29	4	2
146	EP30	4	2
147	EP31	0	2
148	EP32	3	2
149	EP33	3	2
150	EP34	3	2
151	EP35	0	2
152	EP36	3	2
153	EP37	0	2
154	EP38	0	2
155	EP39	4	2
156	EP40	0	2
157	EP41	3	2
158	EP43	0	2
159	EP44	3	2
160	EP45	3	2
161	EP46	3	2
162	CS50	3	2
163	EP47	0	2
164	EP48	0	2
165	EP49	3	2
166	EP50	0	2
167	EP51	0	2
168	EP52	0	2
169	EP53	3	2
170	EP54	3	2
171	EP55	3	2
172	EP56	3	2
173	EP57	3	2
174	EP58	0	2
175	EP59	3	2
176	EP60	0	2
177	EP61	0	2
178	EP62	0	2
179	EP63	3	2
180	EP64	3	2
181	EP65	3	2
182	EP66	4	2
183	EP67	3	2
184	EP68	4	2
185	EP69	0	2
186	EP70	3	2
187	EP71	3	2
188	EP72	0	2
189	EP73	3	2
190	EP74	0	2
191	EP75	3	2
192	EP76	8	2
193	EP77	0	2
194	EP78	4	2
195	EP79	0	2
196	BDM305	0	2
197	BDM307	4	2
198	BDM308	4	2
199	BDM310	4	2
200	BDM311	4	2
201	BDM314	4	2
202	BDM316	4	2
203	BDM318	4	2
204	BDM320	4	2
205	BDM322	4	2
206	BDM323	4	2
207	BDM325	4	2
208	BDM326	4	2
209	BDM331	4	2
210	BDM332	4	2
211	BDM333	4	2
212	BDM335	4	2
213	BDM336	4	2
214	BDM340	4	2
215	BDN11	3	2
216	BDN13	3	2
217	BDN23	3	2
218	BDN37	3	2
219	BDN57	3	2
220	BDN71	3	2
221	BDN85	3	2
222	BDN153	0	2
223	BDN163	4	2
224	BDN182	3	2
225	BDN191	0	2
226	BDN223	3	2
227	BDN238	4	2
228	BDN239	3	2
229	BDN240	3	2
230	BDN241	3	2
231	BDN242	3	2
232	BDN243	3	2
233	BDN245	3	2
234	BDN246	4	2
235	CDr15	1	2
236	BTV	5	3
237	ER Thermo Yellow	1	5
238	ERThermAC	1	4
239	CDb12	6	7
240	MTY	5	6
241	CDy6	4	33
242	BNM490	1	50
243	ETG	1	108
244	DTG	3	108
245	GTG	2	108
246	MTG	5	108
247	LTG	4	108
248	NTG	6	108
249	ER-BZT	1	49
250	Lyso-V	4	9
251	Compound 1	5	8
252	ER-Tracker Red (BODIPY TR Glibenclamide)	1	14
253	ER-Tracker Green (BODIPY FL Glibenclamide)	1	14
254	LysoTracker Red DND-99	4	14
255	LysoTracker Yellow HCK-123	4	14
256	LysoTracker Green DND-26	4	14
257	LysoTracker Blue DND-22	4	14
258	LysoSensor Yellow/Blue DND-160	4	14
259	LysoSensor Green DND-153	4	14
260	LysoSensor Green DND-189	4	14
261	LysoSensor Blue DND-167	4	14
262	LysoSensor Blue DND-192	4	14
263	MitoTracker Orange CMTMRos	5	14
264	MitoTracker Orange CM-H2TMRos	5	14
265	MitoTracker Red CMXRos	5	14
266	MitoTracker Red CM-H2XRos	5	14
267	MitoTracker Red FM	5	14
268	MitoTracker Deep Red FM	5	14
269	Nonyl acridine orange	5	14
270	Dihydrorhodamine 123	5	14
271	DASPEI	5	14
272	JC-1 Dye	5	14
273	JC-9 Dye	5	14
274	BODIPY FL C5-Ceramide	2	14
275	BODIPY FL C5-Lactosylceramide	2	14
276	BODIPY TR Ceramide	2	14
277	BODIPY FL C5-Sphingomyelin	2	14
278	BODIPY FL C12-Sphingomyelin	2	14
279	DiIC16	7	14
280	NBD C6-Ceramide	2	14
281	7-AAD	8	14
282	ACMA	6	14
283	BOBO-1	8	14
284	BOBO-3	8	14
285	Hoechst 33258	6	14
286	TO-PRO-3 Iodide	8	14
287	TOTO-1	8	14
288	TOTO-3	8	14
289	YO-PRO-1	8	14
290	YO-PRO-3	8	14
291	YOYO-1	8	14
292	YOYO-3	8	14
293	PTG	7	108
294	MemGlow™ 488	7	36, 37, 38
295	MemGlow™ 560	7	36, 37, 38
296	MemGlow™ 590	7	36, 37, 38
297	MemGlow™ 640	7	36, 37, 38
298	MemGlow™ 700	7	36, 37, 38
299	14 from original reference	2	84
300	25 from original reference	2	84
301	ANQ-IMC-6	2	85
302	Niblue-C6-IMC	2	86
303	FC-ONOO	2	87
304	CPH	2	88
305	TP-Golgi	2	89
306	Gol-NH	2	90
307	EW2	2	91
308	Dns-LLC	2	92
309	CCA	2	93
310	Golgi-P	2	94
311	1 from original reference	2	95
312	pH-PTT	2	96
313	RSG	2	97
314	1a from original reference	2	98
315	1b from original reference	2	98
316	Gol-H2S	2	99
317	GT-Cys	2	100
318	Gol-Cys	2	101
319	GT-GSH	2	102
320	Gol-CO	2	103
321	ZnDA-1H	2	104
322	SF-1	2	105
323	TPE-Ade	2	106
324	BAOA	2	107
325	Nap-Cys	1	61
326	Na-H2S-ER	1	62
327	SNCL	1	63
328	ERNT	1	64
329	ER-H	1	65
330	ER-Nap-NO	1	66
331	ER-H2O2	1	68
332	ER-NPA	1	69
333	TPER-O2˙−	1	70
334	ER-DTT	1	71
335	1a from original reference	1	73
336	2 from original reference	1	74
337	5 from original reference	1	74
338	3 from original reference	1	74
339	6 from original reference	1	74
340	14 from original reference	1	75
341	21 from original reference	1	75
342	ER-tracker Blue-White DPX	1	76
343	3q from original reference	1	77
344	3t from original reference	1	77
345	NH2-BODIPY	1	76
346	ABAH-LW	1	79
347	NRERCl	1	80
348	TPFL-ER	1	81
349	probe 1 from original reference	1	82
350	HRA	1	83

## Sheet: Structure and Descriptors
No.	name	Structure	LN	Cyto	ER	Golgi	LD	Lyso	Mito	Nuc	PM	Non	LogD_7_4	Chemaxon HLB	Aliphatic atom count	Aliphatic bond count	Aromatic atom count	Aromatic bond count	Chain atom count	Chain bond count	Aliphatic ring count	Aromatic ring count	Carbo ring count	Carboaliphatic ring count	Carboaromatic ring count	Fused aliphatic ring count	Fused aromatic ring count	Fused ring count	Hetero ring count	Heteroaliphatic ring count	Heteroaromatic ring count	Largest ring size	Largest ring system size	Refractivity	Strongest ACIDIC pKa 1	Strongest ACIDIC pKa 2	Strongest BASIC pKa 1	Strongest BASIC pKa 2	Molecular_weight	Formal_charge	No_Total_atoms	No_C	No_H	No_N	No_O	No_P	No_S	No_F	No_Cl
1	2,7,9E-BHVC,		6	0	0	0	0	0	0	1	0	0	-3.35123	1	12	14	25	27	12	14	0	5	2	0	2	0	3	3	3	0	3	6	3	154.609	14.1043	14.7063	-1	-1	491.632	2	70	32	33	3	2	0	0	0	0
2	2-amino-9-methylacridine		3	0	0	0	1	0	0	0	0	0	3.04111	4.26922	2	2	14	16	2	2	0	3	2	0	2	0	3	3	1	0	1	6	3	65.7991	15	15	7.02657	2.99189	208.262	0	28	14	12	2	0	0	0	0	0
3	2-aminoacridine		3	0	0	0	1	0	0	0	0	0	2.63189	4.73739	1	1	14	16	1	1	0	3	2	0	2	0	3	3	1	0	1	6	3	60.7579	15	15	6.45202	2.85687	194.235	0	25	13	10	2	0	0	0	0	0
4	2-Hydroxystilbamidine		8	0	0	0	0	0	0	0	0	1	-1.72398	23.39	9	10	12	12	9	10	0	2	2	0	2	0	0	0	0	0	0	6	1	108.439	8.21761	15	12.1368	11.4151	282.344	2	39	16	18	4	1	0	0	0	0
5	3-amino-6-methoxyacridine		4	0	0	0	0	1	0	0	0	0	2.29919	6.40338	3	3	14	16	3	3	0	3	2	0	2	0	3	3	1	0	1	6	3	67.2211	15	15	7.23508	1.14661	224.262	0	29	14	12	2	1	0	0	0	0
6	3-amino-7-methoxyacridine		4	0	0	0	0	1	0	0	0	0	2.31268	6.40338	3	3	14	16	3	3	0	3	2	0	2	0	3	3	1	0	1	6	3	67.2211	15	15	7.19991	1.283	224.262	0	29	14	12	2	1	0	0	0	0
7	3-amino-6-methoxy-9-(2-chloroethylamino)acridine		6	0	0	0	0	0	0	1	0	0	0.996703	3.235	7	7	14	16	7	7	0	3	2	0	2	0	3	3	1	0	1	6	3	88.5159	15	15	10.1274	0.789183	302.783	1	38	16	17	3	1	0	0	0	1
8	3-amino-6-methoxy-9-ethylaminoacridine		6	0	0	0	0	0	0	1	0	0	0.688565	3.235	6	6	14	16	6	6	0	3	2	0	2	0	3	3	1	0	1	6	3	83.9212	15	15	10.1329	0.923011	268.338	1	38	16	18	3	1	0	0	0	0
9	3,9-diaminoacridine		6	0	0	0	0	0	0	1	0	0	0.176035	3.36	2	2	14	16	2	2	0	3	2	0	2	0	3	3	1	0	1	6	3	67.216	15	15	10.301	0.721158	210.258	1	28	13	12	3	0	0	0	0	0
10	4-aminoacridine		3	0	0	0	1	0	0	0	0	0	2.67025	4.73739	1	1	14	16	1	1	0	3	2	0	2	0	3	3	1	0	1	6	3	60.7579	15	15	5.6229	0.771232	194.235	0	25	13	10	2	0	0	0	0	0
11	9-Amino-3-chloroacridine		4	0	0	0	0	1	0	0	0	0	2.23392	3.36	2	2	14	16	2	2	0	3	2	0	2	0	3	3	1	0	1	6	3	67.3204	15	15	8.51648	-1	229.688	1	26	13	10	2	0	0	0	0	1
12	9-amino-4-methylacridine		4	0	0	0	0	1	0	0	0	0	1.71851	2.885	2	2	14	16	2	2	0	3	2	0	2	0	3	3	1	0	1	6	3	67.5568	15	15	9.24911	-1	209.27	1	29	14	13	2	0	0	0	0	0
13	9-Aminoacridine		4	0	0	0	0	1	0	0	0	0	1.18761	3.36	1	1	14	16	1	1	0	3	2	0	2	0	3	3	1	0	1	6	3	62.5156	15	15	9.29415	-1	195.243	1	26	13	11	2	0	0	0	0	0
14	9-amino-3:4-benzoacridine		3	0	0	0	1	0	0	0	0	0	2.63243	2.24	1	1	18	21	1	1	0	4	3	0	3	0	4	4	1	0	1	6	4	78.9658	15	15	8.4984	-1	245.303	1	32	17	13	2	0	0	0	0	0
15	Acid fuchsin		8	0	0	0	0	0	0	0	0	1	-6.11324	35.415	23	25	12	12	17	19	1	2	3	1	2	0	0	0	0	0	0	6	1	149.484	-4.21703	-3.5179	6.64467	1.86348	538.541	-3	51	20	16	3	9	0	3	0	0
16	Acriflavine		6	0	0	0	0	0	0	1	0	0	-2.80789	2.885	3	3	14	16	3	3	0	3	2	0	2	0	3	3	1	0	1	6	3	72.1127	15	15	2.35226	1.2053	224.285	1	31	14	14	3	0	0	0	0	0
17	Alizarin		5	0	0	0	0	0	1	0	0	0	2.70997	8.26296	6	8	12	12	4	4	1	2	3	1	2	0	0	3	0	0	0	6	3	65.1128	7.4991	11.2027	-1	-1	240.215	0	26	14	8	0	4	0	0	0	0
18	Astrazone pink FG		5	0	0	0	0	0	1	0	0	0	2.90084	1.465	13	15	12	12	10	11	1	2	2	0	2	0	0	2	1	1	0	6	2	120.965	15	15	3.00455	-1	353.914	1	51	22	26	2	0	0	0	0	1
19	Astrazone Red 6B		5	0	0	0	0	0	1	0	0	0	3.77101	0.515	15	17	12	12	12	13	1	2	2	0	2	0	0	2	1	1	0	6	2	130.755	15	15	3.62487	-1	381.967	1	57	24	30	2	0	0	0	0	1
20	Azur B		6	0	0	0	0	0	0	1	0	0	1.93214	4.595	5	5	14	16	5	5	0	3	2	0	2	0	3	3	1	0	1	6	3	98.9843	15	15	4.06639	0.6753	270.371	1	35	15	16	3	0	0	1	0	0
21	Azure A		6	0	0	0	0	0	0	1	0	0	0.556292	5.07	4	4	14	16	4	4	0	3	2	0	2	0	3	3	1	0	1	6	3	94.0876	15	15	3.31197	0.952463	256.344	1	32	14	14	3	0	0	1	0	0
22	Bis-N,N-dimethylacridine		8	0	0	0	0	0	0	0	0	1	-2.6261	1	2	3	28	32	2	3	0	6	4	0	4	0	6	6	2	0	2	6	3	124.502	15	15	-1	-1	386.495	2	52	28	22	2	0	0	0	0	0
23	Bixin		5	0	0	0	0	0	1	0	0	0	2.94698	19.575	29	28	0	0	29	28	0	0	0	0	0	0	0	0	0	0	0	0	0	139.89	4.76657	15	-1	-1	393.501	-1	58	25	29	0	4	0	0	0	0
24	BODIPY FL C12		2	0	0	1	0	0	0	0	0	0	1.90775	18.43	25	27	5	5	18	18	2	1	0	0	0	2	0	3	3	2	1	6	3	131.108	4.95202	15	-1	-1	417.325	-1	62	23	32	2	2	0	0	2	0
25	Brazilin		5	0	0	0	0	0	1	0	0	0	1.76914	10.8026	9	12	12	12	4	4	2	2	3	1	2	2	0	4	1	1	0	6	4	75.5018	9.1453	9.76986	-1	-1	286.283	0	35	16	14	0	5	0	0	0	0
26	C 61		6	0	0	0	0	0	0	1	0	0	2.28395	1.515	9	11	18	18	9	11	0	3	2	0	2	0	0	0	1	0	1	6	1	126.089	15	15	-1	-1	390.58	1	51	24	24	1	0	0	2	0	0
27	Celestin Blue		8	0	0	0	0	0	0	0	0	1	1.40657	13.32	10	10	14	16	10	10	0	3	2	0	2	0	3	3	1	0	1	6	3	102.934	8.60655	15.3483	3.87546	-1.1883	328.347	1	42	17	18	3	4	0	0	0	0
28	Coomassie blue RL		8	0	0	0	0	0	0	0	0	1	-2.67706	36.72	16	18	26	28	16	18	0	5	5	0	5	0	4	4	0	0	0	6	2	162.797	-2.71457	-2.21867	0.263652	-1	625.598	-4	57	26	15	3	10	0	3	0	0
29	Coomassie brilliant blue R		8	0	0	0	0	0	0	0	0	1	7.28559	17.35	27	32	30	30	21	26	1	5	6	1	5	0	0	0	0	0	0	6	1	249.821	-2.44461	-1.84284	3.13311	2.53149	802.978	-1	101	45	44	3	7	0	2	0	0
30	Coriphosphine		6	0	0	0	0	0	0	1	0	0	2.39238	1.935	5	5	14	16	5	5	0	3	2	0	2	0	3	3	1	0	1	6	3	81.9854	15	15	8.32534	2.44274	252.338	1	37	16	18	3	0	0	0	0	0
31	Crystal violet		6	0	0	0	0	0	0	1	0	0	1.39435	0.04	16	18	12	12	10	12	1	2	3	1	2	0	0	0	0	0	0	6	1	146.004	15	15	4.82643	4.21383	372.532	1	58	25	30	3	0	0	0	0	0
32	Cyan 40		6	0	0	0	0	0	0	1	0	0	-1.28576	9.69	11	12	9	10	5	6	1	2	1	0	1	0	2	2	2	1	1	6	2	100.48	15	15	5.92638	-1	283.41	1	39	17	19	2	0	0	1	0	0
33	DAPI		6	0	0	0	0	0	0	1	0	0	-3.32253	21.88	6	7	15	16	6	7	0	3	2	0	2	0	2	2	1	0	1	6	2	107.103	14.5015	15	11.6468	10.993	279.344	2	38	16	17	5	0	0	0	0	0
34	DEAB-TO-3		6	0	0	0	0	0	0	1	0	0	0.00086948	6.85	17	19	16	17	14	15	1	3	2	0	2	0	2	4	2	1	1	6	2	169.308	15	15	10.3245	-1.66604	459.691	2	70	29	37	3	0	0	1	0	0
35	di-8-ANEPPS		7	0	0	0	0	0	0	0	1	0	4.33325	3.825	26	27	16	17	26	27	0	3	2	0	2	0	2	2	1	0	1	6	2	179.375	-1.59507	15	6.16441	-1	592.878	0	94	36	52	2	3	0	1	0	0
36	DiI		7	0	0	0	0	0	0	0	1	0	18.1257	1	49	52	12	12	43	44	2	2	2	0	2	0	0	4	2	2	0	6	2	285.772	15	15	2.55772	-1	834.428	1	158	59	97	2	0	0	0	0	0
37	DiIC1		1	0	1	0	0	0	0	0	0	0	3.02994	9.44	15	18	12	12	9	10	2	2	2	0	2	0	0	4	2	2	0	6	2	129.196	15	15	1.91372	-1	357.517	1	56	25	29	2	0	0	0	0	0
38	DiIC2		1	0	1	0	0	0	0	0	0	0	3.74356	8.49	17	20	12	12	11	12	2	2	2	0	2	0	0	4	2	2	0	6	2	138.694	15	15	2.25625	-1	385.571	1	62	27	33	2	0	0	0	0	0
39	DiIC3		1	0	1	0	0	0	0	0	0	0	4.7886	7.54	19	22	12	12	13	14	2	2	2	0	2	0	0	4	2	2	0	6	2	147.742	15	15	2.53346	-1	413.625	1	68	29	37	2	0	0	0	0	0
40	Dimethyl-pepep		6	0	0	0	0	0	0	1	0	0	-4.52559	1	7	9	17	17	7	9	0	3	0	0	0	0	0	0	3	0	3	6	1	104.375	15	15	-1	-1	317.433	2	47	21	23	3	0	0	0	0	0
41	DiO		7	0	0	0	0	0	0	0	1	0	15.104	1	42	44	15	16	39	40	1	3	2	0	2	0	2	4	2	1	1	6	2	268.347	15	15	-1	-1	782.267	1	142	53	85	2	2	0	0	0	0
42	DiOC14		7	0	0	0	0	0	0	0	1	0	11.5475	1	34	36	15	16	31	32	1	3	2	0	2	0	2	4	2	1	1	6	2	231.539	15	15	-1	-1	670.052	1	118	45	69	2	2	0	0	0	0
43	DiOC2		1	0	1	0	0	0	0	0	0	0	0.721917	10.26	10	12	15	16	7	8	1	3	2	0	2	0	2	4	2	1	1	6	2	121.269	15	15	-1	-1	333.409	1	46	21	21	2	2	0	0	0	0
44	DiOC3		1	0	1	0	0	0	0	0	0	0	1.76696	9.31	12	14	15	16	9	10	1	3	2	0	2	0	2	4	2	1	1	6	2	130.317	15	15	-1	-1	361.463	1	52	23	25	2	2	0	0	0	0
45	Distamycin A		6	0	0	0	0	0	0	1	0	0	-3.34577	48.265	20	22	15	15	20	22	0	3	0	0	0	0	0	0	3	0	3	5	1	146.072	14.3298	15.1375	12.5548	-1.56554	482.521	1	63	22	28	9	4	0	0	0	0
46	DRAQ5		6	0	0	0	0	0	0	1	0	0	1.39282	3.64	18	20	12	12	16	16	1	2	3	1	2	0	0	3	0	0	0	6	3	143.572	8.6492	9.54248	9.06462	8.17771	414.503	2	60	22	30	4	4	0	0	0	0
47	E 144		6	0	0	0	0	0	0	1	0	0	-0.534278	3.85	9	10	16	17	9	10	0	3	2	0	2	0	2	2	1	0	1	6	2	101.031	15	15	-1	-1	336.41	1	47	21	22	1	3	0	0	0	0
48	E 36		6	0	0	0	0	0	0	1	0	0	0.0374978	0.815	3	4	19	21	3	4	0	4	2	0	2	0	4	4	2	0	2	6	2	92.7279	15	15	-1	-1	285.368	1	39	20	17	2	0	0	0	0	0
49	Eosin B		5	0	0	0	0	0	1	0	0	0	1.47573	11.885	15	19	18	18	11	11	2	3	3	0	3	0	0	5	2	2	0	6	5	140.207	4.17447	4.77705	-1	-1	578.083	-2	39	20	6	2	9	0	0	0	0
50	Eosin B		5	0	0	0	0	0	1	0	0	0	-0.968941	29.16	13	14	20	22	13	14	0	4	3	0	3	0	3	3	1	0	1	6	3	151.642	1.95441	3.64821	-0.641172	-1	578.083	-2	39	20	6	2	9	0	0	0	0
51	Eosin Y		5	0	0	0	0	0	1	0	0	0	0.802413	24.96	9	10	20	22	9	10	0	4	3	0	3	0	3	3	1	0	1	6	3	155.264	3.37112	4.00632	-1	-1	645.88	-2	35	20	6	0	5	0	0	0	0
52	Ethidium		8	0	0	0	0	0	0	0	0	1	-0.913331	0.73	4	5	20	22	4	5	0	4	3	0	3	0	3	3	1	0	1	6	3	101.998	15	15	3.62795	0.954262	314.409	1	44	21	20	3	0	0	0	0	0
53	Ethyl Eosin		5	0	0	0	0	0	1	0	0	0	4.83367	5.31	11	12	20	22	11	12	0	4	3	0	3	0	3	3	1	0	1	6	3	153.945	3.73813	15	-1	-1	674.942	-1	42	22	11	0	5	0	0	0	0
54	Evans Blue		8	0	0	0	0	0	0	0	0	1	-7.43516	58.895	42	46	16	17	26	29	3	3	6	3	3	0	2	4	0	0	0	6	2	214.959	-4.08049	-3.87167	4.94455	4.39353	870.851	-4	84	34	26	6	14	0	4	0	0
55	F 22		6	0	0	0	0	0	0	1	0	0	0.0458855	0.425	6	7	16	17	6	7	0	3	2	0	2	0	2	2	1	0	1	6	2	96.07	15	15	4.71447	-1	289.399	1	43	20	21	2	0	0	0	0	0
56	Fast green FCF		8	0	0	0	0	0	0	0	0	1	-3.50567	30.175	22	26	30	30	22	26	0	5	5	0	5	0	0	0	0	0	0	6	1	197.65	-2.63127	-2.15314	3.11093	2.50213	762.863	-2	86	37	34	2	10	0	3	0	0
57	FITC		8	0	0	0	0	0	0	0	0	1	-0.376182	27.06	8	9	20	22	8	9	0	4	3	0	3	0	3	3	1	0	1	6	3	141.863	4.09983	6.04829	-1.77087	-1	387.366	-2	37	21	9	1	5	0	1	0	0
58	Fluorescein		8	0	0	0	0	0	0	0	0	1	-1.30167	24.96	5	6	20	22	5	6	0	4	3	0	3	0	3	3	1	0	1	6	3	124.8	3.6155	6.44424	-1.77087	-1	330.296	-2	35	20	10	0	5	0	0	0	0
59	FM 1-43		7	0	0	0	0	0	0	0	1	0	-1.12031	4.295	21	22	12	12	21	22	0	2	1	0	1	0	0	0	1	0	1	6	1	160.731	15	15	5.94298	-1	451.737	2	82	30	49	3	0	0	0	0	0
60	fura-2 salt		8	0	0	0	0	0	0	0	0	1	-14.3597	107.015	26	28	20	21	26	28	0	4	2	0	2	0	2	2	2	0	2	6	2	217.159	2.813	3.31039	-1	-1	636.504	-3	68	29	22	3	14	0	0	0	0
61	fura-C18		7	0	0	0	0	0	0	0	1	0	-8.53727	108.815	45	47	20	21	45	47	0	4	2	0	2	0	2	2	2	0	2	6	2	300.623	2.71698	3.06053	-1	-1	903.958	-3	120	46	55	4	15	0	0	0	0
62	Gallein		5	0	0	0	0	0	1	0	0	0	-1.68961	28.76	7	8	20	22	7	8	0	4	3	0	3	0	3	3	1	0	1	6	3	128.748	3.61419	6.64018	-1	-1	362.295	-2	37	20	10	0	7	0	0	0	0
63	Gallein		5	0	0	0	0	0	1	0	0	0	3.19149	11.5494	9	13	18	18	5	5	2	3	3	0	3	0	0	5	2	2	0	6	5	95.1819	8.10007	8.72716	-1	-1	364.311	0	39	20	12	0	7	0	0	0	0
64	Hemataein		5	0	0	0	0	0	1	0	0	0	0.699444	10.0444	16	19	6	6	5	5	3	1	3	2	1	3	0	4	1	1	0	6	4	76.8032	8.73817	9.94074	-1	-1	300.267	0	34	16	12	0	6	0	0	0	0
65	Hoechst 33342		6	0	0	0	0	0	0	1	0	0	4.1315	1	10	13	24	26	4	7	1	5	3	0	3	0	4	4	3	1	2	6	2	166.79	11.1609	12.1553	7.87442	5.78144	453.566	1	63	27	29	6	1	0	0	0	0
66	Hydroethidine		0	1	0	0	0	0	0	0	0	0	3.96176	3.08897	6	9	18	18	4	5	1	3	3	0	3	0	0	3	1	1	0	6	3	102.61	15	15	4.83502	3.72211	315.417	0	45	21	21	3	0	0	0	0	0
67	Indulin		8	0	0	0	0	0	0	0	0	1	5.58149	4.36556	4	7	32	34	4	7	0	6	5	0	5	0	3	3	1	0	1	6	3	154.968	15	15	5.72484	3.76131	468.56	0	60	30	24	6	0	0	0	0	0
68	Iodine Green		8	0	0	0	0	0	0	0	0	1	-2.25784	8.49	18	20	12	12	12	14	1	2	3	1	2	0	0	0	0	0	0	6	1	165.554	15	15	4.51434	-1	401.594	2	65	27	35	3	0	0	0	0	0
69	Janus black		5	0	0	0	0	0	1	0	0	0	2.49605	12.04	14	16	20	22	8	10	1	4	4	1	3	0	3	3	1	0	1	6	3	156.135	7.90996	15	2.72211	0.420378	448.546	1	60	28	26	5	1	0	0	0	0
70	Janus green		5	0	0	0	0	0	1	0	0	0	3.84638	1.91	10	12	26	28	10	12	0	5	4	0	4	0	3	3	1	0	1	6	3	168.174	15	15	3.63847	2.66353	475.615	1	67	30	31	6	0	0	0	0	0
71	LysoTracker Red DND-99		4	0	0	0	0	1	0	0	0	0	-4.31864	11.51	19	22	10	10	12	13	2	2	0	0	0	2	0	3	4	2	2	6	3	124.076	15.5114	15	8.50886	-1	400.257	1	54	20	25	5	1	0	0	2	0
72	Methyl Green		6	0	0	0	0	0	0	1	0	0	-2.65339	8.965	17	19	12	12	11	13	1	2	3	1	2	0	0	0	0	0	0	6	1	161.197	15	15	4.51486	-1	387.567	2	62	26	33	3	0	0	0	0	0
73	Methylene Blue		8	0	0	0	0	0	0	0	0	1	-0.619799	4.12	6	6	14	16	6	6	0	3	2	0	2	0	3	3	1	0	1	6	3	103.881	15	15	3.1357	0.364839	284.398	1	38	16	18	3	0	0	1	0	0
74	MitoTracker Green FM		5	0	0	0	0	0	1	0	0	0	6.00314	6.425	15	19	27	28	12	15	1	5	4	0	4	0	2	4	2	1	1	6	2	197.483	15	15	-1	-1	636.426	1	70	34	28	3	1	0	0	0	4
75	Morin		5	0	0	0	0	0	1	0	0	0	0.922242	12.58	6	7	16	17	6	7	0	3	2	0	2	0	2	2	1	0	1	6	2	97.9628	6.36874	7.65618	-1	-1	300.224	-2	30	15	8	0	7	0	0	0	0
76	New Fuchsin		4	0	0	0	0	1	0	0	0	0	2.73637	3	6	6	18	21	6	6	0	4	3	0	3	0	4	4	1	0	1	6	4	121.792	15	15	8.47728	3.43892	318.397	1	44	20	20	3	1	0	0	0	0
77	Nile Red		3	0	0	0	1	0	0	0	0	0	3.83381	4.56474	6	6	18	21	6	6	0	4	3	0	3	0	4	4	1	0	1	6	4	99.0239	15	15	3.90166	-1.31415	318.374	0	42	20	18	2	2	0	0	0	0
78	Nuclear Yellow		6	0	0	0	0	0	0	1	0	0	2.53817	8.425	11	14	24	26	5	8	1	5	3	0	3	0	4	4	3	1	2	6	2	167.736	10.0443	11.1051	7.87154	5.75832	488.586	1	61	25	26	7	2	0	1	0	0
79	octadecanoylaminofluorescein		7	0	0	0	0	0	0	0	1	0	5.25556	26.285	25	26	20	22	25	26	0	4	3	0	3	0	3	3	1	0	1	6	3	213.305	3.45624	6.44535	-1.77087	-1	611.776	-2	90	38	45	1	6	0	0	0	0
80	oil red O		8	0	0	0	0	0	0	0	0	1	7.22921	11.3615	19	22	12	12	9	11	2	2	4	2	2	0	0	2	0	0	0	6	2	130.242	12.2049	15	2.16928	1.07454	408.502	0	55	26	24	4	1	0	0	0	0
81	Orcein		5	0	0	0	0	0	1	0	0	0	3.16464	19.1413	20	24	17	17	12	14	2	3	4	2	2	0	0	3	1	0	1	6	3	146.305	9.0962	9.67819	-1	-1	500.507	0	61	28	24	2	7	0	0	0	0
82	Phenosafranine		8	0	0	0	0	0	0	0	0	1	-0.214239	1.96	2	3	20	22	2	3	0	4	3	0	3	0	3	3	1	0	1	6	3	99.3087	15	15	3.64553	0.076939	287.343	1	37	18	15	4	0	0	0	0	0
83	Phloxine B		5	0	0	0	0	0	1	0	0	0	3.03463	24.96	13	14	20	22	13	14	0	4	3	0	3	0	3	3	1	0	1	6	3	174.483	2.37094	3.75329	-1	-1	783.661	-2	35	20	2	0	5	0	0	0	4
84	Pinacyanol		5	0	0	0	0	0	1	0	0	0	1.13226	7.45	11	13	16	17	7	8	1	3	2	0	2	0	2	4	2	1	1	6	2	119.835	15	15	1.89348	-1	353.486	1	52	25	25	2	0	0	0	0	0
85	Propidium Iodide		8	0	0	0	0	0	0	0	0	1	-4.64023	7.28	11	12	20	22	11	12	0	4	3	0	3	0	3	3	1	0	1	6	3	145.544	15	15	3.48156	0.89075	414.592	2	65	27	34	4	0	0	0	0	0
86	Quinazarin		5	0	0	0	0	0	1	0	0	0	3.57683	8.26296	6	8	12	12	4	4	1	2	3	1	2	0	0	3	0	0	0	6	3	65.1128	8.47659	10.2635	-1	-1	240.215	0	26	14	8	0	4	0	0	0	0
87	Rhodamine 123		5	0	0	0	0	0	1	0	0	0	2.37323	5.985	6	7	20	22	6	7	0	4	3	0	3	0	3	3	1	0	1	6	3	124.173	15	15	0.731104	-0.349557	345.377	1	43	21	17	2	3	0	0	0	0
88	Rhodamine 3B		5	0	0	0	0	0	1	0	0	0	2.27412	1.71	15	16	20	22	15	16	0	4	3	0	3	0	3	3	1	0	1	6	3	167.438	15	15	4.22453	-1	471.618	1	70	30	35	2	3	0	0	0	0
89	Rhodamine 6G		5	0	0	0	0	0	1	0	0	0	4.4176	3.61	11	12	20	22	11	12	0	4	3	0	3	0	3	3	1	0	1	6	3	148.809	15	15	2.31866	1.48477	415.511	1	58	26	27	2	3	0	0	0	0
90	Rhodamine B		5	0	0	0	0	0	1	0	0	0	2.34187	21.36	13	14	20	22	13	14	0	4	3	0	3	0	3	3	1	0	1	6	3	168.757	3.60107	15	2.04321	1.10656	442.556	0	63	28	30	2	3	0	0	0	0
91	rhodamine-DHPE		7	0	0	0	0	0	0	0	1	0	11.663	29.935	64	65	20	22	64	65	0	4	3	0	3	0	3	3	1	0	1	6	3	357.183	-2.09684	1.73612	2.28669	1.04411	1231.61	-1	185	64	101	3	14	1	2	0	0
92	A41B2		6	0	0	0	0	0	0	1	0	0	1.3482	0.695	18	21	12	12	9	11	2	2	3	2	1	2	0	2	1	0	1	6	2	122.542	15	15	-1	-1	408.559	1	64	26	34	1	3	0	0	0	0
93	Structure 2b		6	0	0	0	0	0	0	1	0	0	-1.97103	1	8	10	25	27	8	10	0	5	2	0	2	0	3	3	3	0	3	6	3	142.024	15	15	-1	-1	431.579	2	62	30	29	3	0	0	0	0	0
94	Structure 2c		6	0	0	0	0	0	0	1	0	0	-2.32784	1	7	9	25	27	7	9	0	5	2	0	2	0	3	3	3	0	3	6	3	137.275	15	15	-1	-1	417.552	2	59	29	27	3	0	0	0	0	0
95	Structure 5a		6	0	0	0	0	0	0	1	0	0	0.0536111	12.035	12	15	15	16	5	6	2	3	2	0	2	2	2	5	3	2	1	6	3	126.02	15	15	6.3614	-1	392.513	1	45	21	18	3	1	0	2	0	0
96	Structure 5b		6	0	0	0	0	0	0	1	0	0	-0.726494	12.035	12	15	15	16	5	6	2	3	2	0	2	2	2	5	3	2	1	6	3	121.614	15	15	6.16303	-1	376.452	1	45	21	18	3	2	0	1	0	0
97	sulforhodamine b		8	0	0	0	0	0	0	0	0	1	-0.0708938	22.26	18	19	20	22	18	19	0	4	3	0	3	0	3	3	1	0	1	6	3	169.666	-2.63676	-1.92235	2.05382	1.10781	557.655	-1	67	27	29	2	7	0	2	0	0
98	TMA-DPH		7	0	0	0	0	0	0	0	1	0	1.42722	8.765	10	11	12	12	10	11	0	2	2	0	2	0	0	0	0	0	0	6	1	111.771	15	15	-1	-1	290.427	1	46	21	24	1	0	0	0	0	0
99	Topotecan		6	0	0	0	0	0	0	1	0	0	-0.985379	7.86	15	18	16	17	10	10	2	3	1	0	1	0	2	5	4	2	2	6	5	126.033	8.00177	11.6814	9.88769	1.73706	422.459	1	55	23	24	3	5	0	0	0	0
100	TRITC		8	0	0	0	0	0	0	0	0	1	1.21233	24.56	12	13	20	22	12	13	0	4	3	0	3	0	3	3	1	0	1	6	3	163.628	3.42151	15	1.19225	0.245781	443.519	0	53	25	21	3	3	0	1	0	0
101	Trypan Blue		8	0	0	0	0	0	0	0	0	1	-10.1728	54.42	42	46	16	17	26	29	3	3	6	3	3	0	2	4	0	0	0	6	2	213.487	-3.68982	-3.64412	4.89616	4.34513	870.851	-4	84	34	26	6	14	0	4	0	0
102	Umbelliferone		5	0	0	0	0	0	1	0	0	0	1.88659	9.63253	2	2	10	11	2	2	0	2	1	0	1	0	2	2	1	0	1	6	2	43.5295	9.03576	15	-1	-1	162.145	0	18	9	6	0	3	0	0	0	0
103	AMDA		6	0	0	0	0	0	0	1	0	0	-0.357543	5.135	7	7	14	16	7	7	0	3	2	0	2	0	3	3	1	0	1	6	3	85.4649	15.5884	15	10.1233	0.874878	284.337	1	39	16	18	3	2	0	0	0	0
104	Furamidine (DB75)		6	0	0	0	0	0	0	1	0	0	-2.69986	21.32	6	8	17	17	6	8	0	3	2	0	2	0	0	0	1	0	1	6	1	113.544	15	15	11.4179	10.8159	306.366	2	41	18	18	4	1	0	0	0	0
105	DB181		6	0	0	0	0	0	0	1	0	0	-0.556394	18.47	12	14	17	17	12	14	0	3	2	0	2	0	0	0	1	0	1	6	1	141.428	15	15	11.1099	10.5078	390.527	2	59	24	30	4	1	0	0	0	0
106	DB226		6	0	0	0	0	0	0	1	0	0	1.55991	16.57	16	18	17	17	16	18	0	3	2	0	2	0	0	0	1	0	1	6	1	159.524	15	15	10.9848	10.3827	446.634	2	71	28	38	4	1	0	0	0	0
107	DB244		6	0	0	0	0	0	0	1	0	0	0.635333	16.57	16	20	17	17	6	10	2	3	4	2	2	0	0	0	1	0	1	6	1	155.919	15	15	10.9728	10.3707	442.603	2	67	28	34	4	1	0	0	0	0
108	DB249		6	0	0	0	0	0	0	1	0	0	1.52447	15.62	18	22	17	17	6	10	2	3	4	2	2	0	0	0	1	0	1	6	1	165.121	15	15	10.9728	10.3707	470.656	2	73	30	38	4	1	0	0	0	0
109	DB417		6	0	0	0	0	0	0	1	0	0	-2.15996	20.37	8	10	17	17	8	10	0	3	2	0	2	0	0	0	1	0	1	6	1	123.093	15	15	11.6177	11.0156	334.42	2	47	20	22	4	1	0	0	0	0
110	hexacyclic acridinium cyanine dye 9		6	0	0	0	0	0	0	1	0	0	1.02253	0.17	2	2	24	29	2	2	0	6	3	0	3	0	6	6	3	0	3	6	6	116.943	15	15	0.0512372	-1	336.415	1	44	23	18	3	0	0	0	0	0
111	FLEth		6	0	0	0	0	0	0	1	0	0	1.40496	26.665	16	19	40	44	16	19	0	8	6	0	6	0	6	6	2	0	2	6	3	260.618	3.22928	6.4462	3.84279	0.962751	758.87	-1	92	45	36	5	5	0	1	0	0
112	BAO (2,5-bis(4-aminophenyl)-1,3,4-oxadiazole)		6	0	0	0	0	0	0	1	0	0	1.34636	5.78393	2	4	17	17	2	4	0	3	2	0	2	0	0	0	1	0	1	6	1	96.5876	15	15	2.94766	2.2575	252.275	0	31	14	12	4	1	0	0	0	0
113	Harmine		4	0	0	0	0	1	0	0	0	0	1.82382	7.12766	3	3	13	15	3	3	0	3	1	0	1	0	3	3	2	0	2	6	3	62.37	13.543	15	6.15384	-1	212.25	0	28	13	12	2	1	0	0	0	0
114	Chloroquine		4	0	0	0	0	1	0	0	0	0	0.8786	0.205	12	12	10	11	12	12	0	2	1	0	1	0	2	2	1	0	1	6	2	107.44	15	15	10.3244	7.28527	320.884	1	49	18	27	3	0	0	0	0	1
115	Cycloguanil		4	0	0	0	0	1	0	0	0	0	0.768658	22.695	11	12	6	6	5	6	1	1	1	0	1	0	0	0	1	1	0	6	1	90.3473	14.4869	15	8.17822	5.91707	252.726	1	32	11	15	5	0	0	0	0	1
116	Quinine		4	0	0	0	0	1	0	0	0	0	0.863951	2.455	14	16	10	11	6	7	2	2	1	0	1	2	2	4	3	2	1	6	2	105.71	13.892	15	9.04555	4.01715	325.43	1	49	20	25	2	2	0	0	0	0
117	Pyrimethamine		4	0	0	0	0	1	0	0	0	0	2.23343	3.25	5	6	12	12	5	6	0	2	1	0	1	0	0	0	1	0	1	6	1	71.9523	15	15	7.77318	1.1005	249.722	1	31	12	14	4	0	0	0	0	1
118	EP1		0	1	0	0	0	0	0	0	0	0	-3.60327	3.38	13	15	5	5	6	6	2	1	0	0	0	2	0	3	3	2	1	6	3	76.1629	15	15	-1	-1	266.115	0	31	12	13	2	0	0	1	2	0
119	EP2		3	0	0	0	1	0	0	0	0	0	-2.64427	2.905	14	16	5	5	7	7	2	1	0	0	0	2	0	3	3	2	1	6	3	80.6394	15	15	7.06816	-1	280.142	0	34	13	15	2	0	0	1	2	0
120	EP3		3	0	0	0	1	0	0	0	0	0	-2.73977	2.43	15	17	5	5	8	8	2	1	0	0	0	2	0	3	3	2	1	6	3	85.8051	15	15	-1	-1	294.168	0	37	14	17	2	0	0	1	2	0
121	EP4		0	1	0	0	0	0	0	0	0	0	-4.07047	3.855	12	14	5	5	5	5	2	1	0	0	0	2	0	3	3	2	1	6	3	71.1217	15	15	-1	-1	252.088	0	28	11	11	2	0	0	1	2	0
122	EP5		3	0	0	0	1	0	0	0	0	0	-1.95617	1.35	10	13	11	11	3	4	2	2	1	0	1	2	0	3	3	2	1	6	3	92.0041	15	15	-1	-1	282.099	0	34	16	13	2	0	0	0	2	0
123	EP6		0	1	0	0	0	0	0	0	0	0	-3.02767	2.555	11	13	5	5	4	4	2	1	0	0	0	2	0	3	3	2	1	6	3	63.4926	15	15	-1	-1	220.028	0	27	11	11	2	0	0	0	2	0
124	EP7		0	1	0	0	0	0	0	0	0	0	-2.06867	2.08	12	14	5	5	5	5	2	1	0	0	0	2	0	3	3	2	1	6	3	67.9691	15	15	7.71231	-1	234.055	0	30	12	13	2	0	0	0	2	0
125	EP8		3	0	0	0	1	0	0	0	0	0	-2.16417	1.605	13	15	5	5	6	6	2	1	0	0	0	2	0	3	3	2	1	6	3	73.1348	15	15	-1	-1	248.082	0	33	13	15	2	0	0	0	2	0
126	EP9		8	0	0	0	0	0	0	0	0	1	-4.98777	4.33	13	15	5	5	6	6	2	1	0	0	0	2	0	3	3	2	1	6	3	71.1209	15	15	-1	-1	266.072	0	27	11	9	2	1	0	1	2	0
127	EP10		0	1	0	0	0	0	0	0	0	0	-2.29517	1.825	11	14	11	11	4	5	2	2	1	0	1	2	0	3	3	2	1	6	3	93.4384	15	15	-1	-1	296.082	0	33	16	11	2	1	0	0	2	0
128	EP11		0	1	0	0	0	0	0	0	0	0	-3.87647	3.38	13	15	5	5	6	6	2	1	0	0	0	2	0	3	3	2	1	6	3	69.5714	15	15	6.66621	-1	250.054	0	31	12	13	2	1	0	0	2	0
129	EP12		3	0	0	0	1	0	0	0	0	0	-2.90907	3.38	15	17	5	5	8	8	2	1	0	0	0	2	0	3	3	2	1	6	3	84.8035	15	15	2.96286	-1	407.846	0	31	12	11	2	1	0	0	2	0
130	EP13		3	0	0	0	1	0	0	0	0	0	-3.19967	2.385	9	12	10	10	2	3	2	2	0	0	0	2	0	3	4	2	2	6	3	81.4907	14.9338	15	-1	-1	257.049	0	29	13	10	3	0	0	0	2	0
131	EP14		3	0	0	0	1	0	0	0	0	0	-1.17887	1.825	10	13	11	11	3	4	2	2	1	0	1	2	0	3	3	2	1	6	3	94.4772	15	15	-1	-1	346.968	0	31	15	10	2	0	0	0	2	0
132	EP15		3	0	0	0	1	0	0	0	0	0	-2.93587	3.38	14	16	5	5	7	7	2	1	0	0	0	2	0	3	3	2	1	6	3	83.2075	15	15	4.43579	-1	345.011	0	31	12	12	2	0	0	1	2	0
133	EP17		0	1	0	0	0	0	0	0	0	0	-3.11147	3.38	13	15	5	5	6	6	2	1	0	0	0	2	0	3	3	2	1	6	3	75.5982	15	15	7.01865	-1	266.115	0	31	12	13	2	0	0	1	2	0
134	EP18		0	1	0	0	0	0	0	0	0	0	-4.08497	4.33	11	13	5	5	4	4	2	1	0	0	0	2	0	3	3	2	1	6	3	65.972	15	15	-1	-1	238.061	0	25	10	9	2	0	0	1	2	0
135	EP19		4	0	0	0	0	1	0	0	0	0	1.20913	1	10	15	23	23	3	6	2	4	3	0	3	2	0	3	3	2	1	6	3	140.015	15	15	-1	-1	435.282	0	53	27	20	3	0	0	0	2	0
136	EP20		3	0	0	0	1	0	0	0	0	0	-1.70651	0.875	12	15	11	11	5	6	2	2	1	0	1	2	0	3	3	2	1	6	3	101.283	15	15	4.14399	-1	311.14	0	39	17	16	3	0	0	0	2	0
137	EP21		0	1	0	0	0	0	0	0	0	0	0.185326	1	22	24	5	5	15	15	2	1	0	0	0	2	0	3	3	2	1	6	3	116.703	15	15	-1	-1	392.356	0	58	21	31	2	0	0	1	2	0
138	EP22		0	1	0	0	0	0	0	0	0	0	0.502609	21.975	16	19	11	11	9	10	2	2	1	0	1	2	0	3	3	2	1	6	3	141.285	4.26378	15	3.5962	-1	590.92	-1	39	18	12	2	2	0	0	2	0
139	EP23		3	0	0	0	1	0	0	0	0	0	-1.50347	1.35	10	13	11	11	3	4	2	2	1	0	1	2	0	3	3	2	1	6	3	91.8956	15	15	-1	-1	282.099	0	34	16	13	2	0	0	0	2	0
140	EP24		3	0	0	0	1	0	0	0	0	0	0.539626	1	14	17	11	11	7	8	2	2	1	0	1	2	0	3	3	2	1	6	3	113.502	15	15	7.84477	-1	403.075	0	43	19	18	2	0	0	0	2	0
141	EP25		0	1	0	0	0	0	0	0	0	0	-1.97067	1.825	9	12	11	11	2	3	2	2	1	0	1	2	0	3	3	2	1	6	3	86.8544	15	15	-1	-1	268.072	0	31	15	11	2	0	0	0	2	0
142	EP26		3	0	0	0	1	0	0	0	0	0	-0.386074	0.4	13	16	11	11	6	7	2	2	1	0	1	2	0	3	3	2	1	6	3	102.918	15	15	-1	-1	340.254	0	43	18	19	2	0	0	0	2	0
143	EP27		0	1	0	0	0	0	0	0	0	0	-2.54787	2.65	13	16	11	11	6	7	2	2	1	0	1	2	0	3	3	2	1	6	3	99.9016	15	15	-1	-1	326.109	0	37	17	13	2	2	0	0	2	0
144	EP28		0	1	0	0	0	0	0	0	0	0	-2.29517	1.825	11	14	11	11	4	5	2	2	1	0	1	2	0	3	3	2	1	6	3	93.4384	15	15	-1	-1	296.082	0	33	16	11	2	1	0	0	2	0
145	EP29		4	0	0	0	0	1	0	0	0	0	-1.83589	22.925	12	15	11	11	5	6	2	2	1	0	1	2	0	3	3	2	1	6	3	104.948	3.94311	15	-1	-1	311.074	-1	33	16	10	2	2	0	0	2	0
146	EP30		4	0	0	0	0	1	0	0	0	0	-7.67084	11.955	13	15	5	5	6	6	2	1	0	0	0	2	0	3	3	2	1	6	3	80.8687	15	15	9.21627	-0.525845	251.065	1	32	11	14	4	0	0	0	2	0
147	EP31		0	1	0	0	0	0	0	0	0	0	-1.19017	0.875	11	14	11	11	4	5	2	2	1	0	1	2	0	3	3	2	1	6	3	87.9973	15	15	-1	-1	294.11	0	35	17	13	2	0	0	0	2	0
148	EP32		3	0	0	0	1	0	0	0	0	0	-1.43807	0.145	10	14	17	17	3	5	2	3	2	0	2	2	0	3	3	2	1	6	3	108.778	15	15	-1	-1	376.151	0	43	21	16	2	0	1	0	2	0
149	EP33		3	0	0	0	1	0	0	0	0	0	-0.997174	0.875	11	14	11	11	4	5	2	2	1	0	1	2	0	3	3	2	1	6	3	96.4806	15	15	7.7486	-1	296.125	0	37	17	15	2	0	0	0	2	0
150	EP34		3	0	0	0	1	0	0	0	0	0	-2.14407	3.38	15	17	5	5	8	8	2	1	0	0	0	2	0	3	3	2	1	6	3	90.8303	15	15	3.41289	-1	423.907	0	31	12	11	2	0	0	1	2	0
151	EP35		0	1	0	0	0	0	0	0	0	0	-3.24247	11.225	10	13	11	11	3	4	2	2	1	0	1	2	0	3	3	2	1	6	3	83.1845	14.5934	15	-1.45752	-1	283.087	0	33	15	12	3	0	0	0	2	0
152	EP36		3	0	0	0	1	0	0	0	0	0	-1.64568	9.58	19	22	5	5	6	7	3	1	0	0	0	2	0	3	4	3	1	6	3	115.4	15	15	5.63965	0.185217	554.954	0	42	16	18	3	0	0	0	2	0
153	EP37		0	1	0	0	0	0	0	0	0	0	-5.04868	12.305	15	18	5	5	2	3	3	1	0	0	0	2	0	3	4	3	1	6	3	75.9953	15	15	1.90779	-1	277.08	0	34	13	14	3	1	0	0	2	0
154	EP38		0	1	0	0	0	0	0	0	0	0	-2.87777	10.275	12	15	11	11	5	6	2	2	1	0	1	2	0	3	3	2	1	6	3	90.6575	15	15	1.17657	-1	311.14	0	39	17	16	3	0	0	0	2	0
155	EP39		4	0	0	0	0	1	0	0	0	0	-5.83166	10.055	17	20	5	5	4	5	3	1	0	0	0	2	0	3	4	3	1	6	3	98.7173	15	15	8.94387	7.33553	305.156	1	42	15	20	4	0	0	0	2	0
156	EP40		0	1	0	0	0	0	0	0	0	0	-0.471074	1	10	15	22	22	3	6	2	4	2	0	2	2	0	3	4	2	2	6	3	143.492	15	15	-0.199432	-1	425.246	0	50	24	18	5	0	0	0	2	0
157	EP41		3	0	0	0	1	0	0	0	0	0	-0.723774	1	12	17	22	22	5	8	2	4	2	0	2	2	0	3	4	2	2	6	3	149.955	15	15	-0.196512	-1	455.273	0	54	25	20	5	1	0	0	2	0
158	EP43		0	1	0	0	0	0	0	0	0	0	0.278426	1	12	17	26	27	5	8	2	5	3	0	3	2	2	5	4	2	2	6	3	166.405	15	15	-0.20084	-1	505.332	0	60	29	22	5	1	0	0	2	0
159	EP44		3	0	0	0	1	0	0	0	0	0	-0.471074	1	10	15	22	22	3	6	2	4	2	0	2	2	0	3	4	2	2	6	3	143.492	15	15	-0.200215	-1	425.246	0	50	24	18	5	0	0	0	2	0
160	EP45		3	0	0	0	1	0	0	0	0	0	-0.0038742	1	11	16	22	22	4	7	2	4	2	0	2	2	0	3	4	2	2	6	3	148.533	15	15	-0.198438	-1	439.273	0	53	25	20	5	0	0	0	2	0
161	EP46		3	0	0	0	1	0	0	0	0	0	-0.723774	1	12	17	22	22	5	8	2	4	2	0	2	2	0	3	4	2	2	6	3	149.955	15	15	-0.197296	-1	455.273	0	54	25	20	5	1	0	0	2	0
162	CS50		3	0	0	0	1	0	0	0	0	0	0.278426	1	12	17	26	27	5	8	2	5	3	0	3	2	2	5	4	2	2	6	3	166.405	15	15	-0.201624	-1	505.332	0	60	29	22	5	1	0	0	2	0
163	EP47		0	1	0	0	0	0	0	0	0	0	1.08423	1.35	14	17	11	11	7	8	2	2	1	0	1	2	0	3	3	2	1	6	3	121.915	15	15	-1	-1	597.683	0	34	16	9	2	0	0	0	2	0
164	EP48		0	1	0	0	0	0	0	0	0	0	1.08423	1.35	14	17	11	11	7	8	2	2	1	0	1	2	0	3	3	2	1	6	3	121.915	15	15	-1	-1	597.683	0	34	16	9	2	0	0	0	2	0
165	EP49		3	0	0	0	1	0	0	0	0	0	-1.07187	1.375	19	22	11	11	12	13	2	2	1	0	1	2	0	3	3	2	1	6	3	126.14	14.6453	15	1.4135	-1	411.257	0	54	22	24	3	2	0	0	2	0
166	EP50		0	1	0	0	0	0	0	0	0	0	-2.01477	11.03	22	24	5	5	15	15	2	1	0	0	0	2	0	3	3	2	1	6	3	104.746	15	15	-1.22811	-1	377.24	0	53	19	26	3	2	0	0	2	0
167	EP51		0	1	0	0	0	0	0	0	0	0	-2.30027	10.75	12	15	11	11	5	6	2	2	1	0	1	2	0	3	3	2	1	6	3	99.6012	15	15	1.01162	-1	423.01	0	36	16	13	3	0	0	0	2	0
168	EP52		0	1	0	0	0	0	0	0	0	0	-2.07847	3.125	11	14	11	11	4	5	2	2	1	0	1	2	0	3	3	2	1	6	3	92.8164	15	15	-1	-1	409.968	0	32	15	10	2	1	0	0	2	0
169	EP53		3	0	0	0	1	0	0	0	0	0	-3.50937	3.505	9	11	5	5	2	2	2	1	0	0	0	2	0	3	3	2	1	6	3	53.3017	15	15	-1	-1	191.974	0	21	9	7	2	0	0	0	2	0
170	EP54		3	0	0	0	1	0	0	0	0	0	-1.17887	1.825	10	13	11	11	3	4	2	2	1	0	1	2	0	3	3	2	1	6	3	94.4772	15	15	-1	-1	346.968	0	31	15	10	2	0	0	0	2	0
171	EP55		3	0	0	0	1	0	0	0	0	0	-0.286274	0.145	9	13	17	17	2	4	2	3	2	0	2	2	0	3	3	2	1	6	3	111.991	15	15	-1	-1	344.17	0	41	21	15	2	0	0	0	2	0
172	EP56		3	0	0	0	1	0	0	0	0	0	-1.07417	0.875	11	14	11	11	4	5	2	2	1	0	1	2	0	3	3	2	1	6	3	96.5407	15	15	-1	-1	294.11	0	35	17	13	2	0	0	0	2	0
173	EP57		3	0	0	0	1	0	0	0	0	0	-3.13617	2.08	16	18	5	5	9	9	2	1	0	0	0	2	0	3	3	2	1	6	3	77.244	8.84938	15	-1	-1	290.076	0	34	14	13	2	2	0	0	2	0
174	EP58		0	1	0	0	0	0	0	0	0	0	-0.0761742	2.975	16	19	11	11	9	10	2	2	1	0	1	2	0	3	3	2	1	6	3	118.033	15	15	3.79791	-1	498.915	0	39	17	12	3	2	0	0	2	0
175	EP59		3	0	0	0	1	0	0	0	0	0	7.23473	1	24	29	23	23	17	20	2	4	3	0	3	2	0	3	3	2	1	6	3	189.3	15	15	3.63572	-1	780.158	0	68	34	21	2	0	0	0	8	0
176	EP60		0	1	0	0	0	0	0	0	0	0	-2.39527	2.08	12	14	5	5	5	5	2	1	0	0	0	2	0	3	3	2	1	6	3	66.7857	15	15	-1	-1	234.055	0	30	12	13	2	0	0	0	2	0
177	EP61		0	1	0	0	0	0	0	0	0	0	-4.19117	22.955	16	18	5	5	9	9	2	1	0	0	0	2	0	3	3	2	1	6	3	75.1907	-1.81733	15	1.28024	-1	314.093	-1	32	11	11	3	3	0	1	2	0
178	EP62		0	1	0	0	0	0	0	0	0	0	-3.64257	2.905	14	16	5	5	7	7	2	1	0	0	0	2	0	3	3	2	1	6	3	73.8188	15	15	-1	-1	264.081	0	34	13	15	2	1	0	0	2	0
179	EP63		3	0	0	0	1	0	0	0	0	0	-1.56847	2.555	13	15	5	5	6	6	2	1	0	0	0	2	0	3	3	2	1	6	3	78.16	15	15	3.79973	-1	377.82	0	27	11	9	2	0	0	0	2	0
180	EP64		3	0	0	0	1	0	0	0	0	0	0.437426	0.4	14	17	11	11	7	8	2	2	1	0	1	2	0	3	3	2	1	6	3	116.754	15	15	4.37352	-1	467.945	0	40	18	15	2	0	0	0	2	0
181	EP65		3	0	0	0	1	0	0	0	0	0	-1.17887	1.825	10	13	11	11	3	4	2	2	1	0	1	2	0	3	3	2	1	6	3	94.4772	15	15	-1	-1	346.968	0	31	15	10	2	0	0	0	2	0
182	EP66		4	0	0	0	0	1	0	0	0	0	-4.79367	11.48	13	15	5	5	6	6	2	1	0	0	0	2	0	3	3	2	1	6	3	69.2063	15	15	0.775528	-1	245.038	0	28	12	10	3	0	0	0	2	0
183	EP67		3	0	0	0	1	0	0	0	0	0	0.353726	1	9	12	21	24	2	3	2	5	4	0	4	2	4	7	3	2	1	6	4	127.519	15	15	-1	-1	392.214	0	45	25	15	2	0	0	0	2	0
184	EP68		4	0	0	0	0	1	0	0	0	0	-5.06748	12.43	11	13	5	5	4	4	2	1	0	0	0	2	0	3	3	2	1	6	3	61.6261	15	15	1.92935	-1	221.016	0	26	10	10	3	0	0	0	2	0
185	EP69		0	1	0	0	0	0	0	0	0	0	-4.23368	11.005	14	16	5	5	7	7	2	1	0	0	0	2	0	3	3	2	1	6	3	75.4317	15	15	2.16151	-1	263.096	0	35	13	16	3	0	0	0	2	0
186	EP70		3	0	0	0	1	0	0	0	0	0	-1.24387	0.875	11	14	11	11	4	5	2	2	1	0	1	2	0	3	3	2	1	6	3	86.8283	15	15	-1	-1	296.125	0	37	17	15	2	0	0	0	2	0
187	EP71		3	0	0	0	1	0	0	0	0	0	-1.50347	1.35	10	13	11	11	3	4	2	2	1	0	1	2	0	3	3	2	1	6	3	91.8956	15	15	-1	-1	282.099	0	34	16	13	2	0	0	0	2	0
188	EP72		0	1	0	0	0	0	0	0	0	0	-2.80597	3.25	11	14	11	11	4	5	2	2	1	0	1	2	0	3	3	2	1	6	3	93.6703	14.9216	15	-1	-1	298.098	0	35	16	13	2	1	0	0	2	0
189	EP73		3	0	0	0	1	0	0	0	0	0	0.450026	0.4	14	17	11	11	7	8	2	2	1	0	1	2	0	3	3	2	1	6	3	111.568	15	15	-1	-1	379.042	0	40	18	15	2	0	0	0	2	2
190	EP74		0	1	0	0	0	0	0	0	0	0	-2.19657	4.75	14	17	11	11	7	8	2	2	1	0	1	2	0	3	3	2	1	6	3	97.035	15	15	-1	-1	359.156	0	37	16	12	3	2	0	1	2	0
191	EP75		3	0	0	0	1	0	0	0	0	0	-1.80477	0.055	20	23	5	5	7	8	3	1	1	1	0	2	0	3	3	2	1	6	3	99.1292	15	15	-1	-1	346.226	0	50	19	25	2	1	0	0	2	0
192	EP76		8	0	0	0	0	0	0	0	0	1	-0.748874	8.31	15	19	21	22	8	10	2	4	2	0	2	2	2	5	4	2	2	6	3	132.32	15	15	-1	-1	506.286	0	53	25	17	2	5	0	1	2	0
193	EP77		0	1	0	0	0	0	0	0	0	0	2.17813	1	38	45	11	11	14	16	6	2	5	4	1	6	0	7	3	2	1	6	4	198.685	15	15	-1	-1	668.629	0	96	40	47	2	4	0	0	2	0
194	EP78		4	0	0	0	0	1	0	0	0	0	-5.47578	12.905	10	12	5	5	3	3	2	1	0	0	0	2	0	3	3	2	1	6	3	56.8515	15	15	2.75058	-1	206.989	0	23	9	8	3	0	0	0	2	0
195	EP79		0	1	0	0	0	0	0	0	0	0	-2.80597	3.25	11	14	11	11	4	5	2	2	1	0	1	2	0	3	3	2	1	6	3	93.6703	14.8497	15	-1	-1	298.098	0	35	16	13	2	1	0	0	2	0
196	BDM305		0	1	0	0	0	0	0	0	0	0	-4.06828	1.1	20	23	11	11	13	14	2	2	1	0	1	2	0	3	3	2	1	6	3	130.58	15	15	9.79601	-1	430.256	1	55	22	24	3	2	0	0	3	0
197	BDM307		4	0	0	0	0	1	0	0	0	0	-4.30688	3	20	23	11	11	13	14	2	2	1	0	1	2	0	3	3	2	1	6	3	132.345	9.23747	15	9.93648	-1	428.264	1	56	22	25	3	3	0	0	2	0
198	BDM308		4	0	0	0	0	1	0	0	0	0	-1.23738	1	18	22	17	17	11	13	2	3	2	0	2	2	0	3	3	2	1	6	3	153.288	15	15	9.79601	-1	513.2	1	58	26	23	3	1	0	0	2	2
199	BDM310		4	0	0	0	0	1	0	0	0	0	-3.02068	1	19	22	11	11	12	13	2	2	1	0	1	2	0	3	3	2	1	6	3	133.983	15	15	9.79601	-1	410.292	1	57	23	27	3	1	0	0	2	0
200	BDM311		4	0	0	0	0	1	0	0	0	0	-2.13388	1	17	21	17	17	10	12	2	3	2	0	2	2	0	3	3	2	1	6	3	143.894	15	15	9.79601	-1	462.3	1	58	26	24	3	1	0	0	3	0
201	BDM314		4	0	0	0	0	1	0	0	0	0	-3.81558	0.275	18	21	11	11	11	12	2	2	1	0	1	2	0	3	3	2	1	6	3	124.117	15	15	9.79601	-1	400.229	1	51	21	22	3	1	0	0	3	0
202	BDM316		4	0	0	0	0	1	0	0	0	0	-3.52278	0.15	21	24	11	11	14	15	2	2	1	0	1	2	0	3	3	2	1	6	3	139.861	15	15	9.79601	-1	440.319	1	61	24	29	3	2	0	0	2	0
203	BDM318		4	0	0	0	0	1	0	0	0	0	-3.52241	1.35	17	20	11	11	10	11	2	2	1	0	1	2	0	3	3	2	1	6	3	119.635	8.98045	15	9.86808	-1	386.203	1	48	20	20	3	1	0	0	3	0
204	BDM320		4	0	0	0	0	1	0	0	0	0	-3.86528	0.625	20	23	11	11	13	14	2	2	1	0	1	2	0	3	3	2	1	6	3	135.112	15	15	9.79601	-1	426.292	1	58	23	27	3	2	0	0	2	0
205	BDM322		4	0	0	0	0	1	0	0	0	0	-2.13388	1	17	21	17	17	10	12	2	3	2	0	2	2	0	3	3	2	1	6	3	143.894	15	15	9.79601	-1	462.3	1	58	26	24	3	1	0	0	3	0
206	BDM323		4	0	0	0	0	1	0	0	0	0	-3.61258	1	18	21	11	11	11	12	2	2	1	0	1	2	0	3	3	2	1	6	3	128.649	15	15	9.79601	-1	396.266	1	54	22	25	3	1	0	0	2	0
207	BDM325		4	0	0	0	0	1	0	0	0	0	-0.700685	1	25	28	11	11	18	19	2	2	1	0	1	2	0	3	3	2	1	6	3	161.232	15	15	9.79601	-1	494.453	1	75	29	39	3	1	0	0	2	0
208	BDM326		4	0	0	0	0	1	0	0	0	0	-3.10088	1	19	22	11	11	12	13	2	2	1	0	1	2	0	3	3	2	1	6	3	123.909	15	15	9.79601	-1	418.22	1	51	21	21	3	1	0	0	4	0
209	BDM331		4	0	0	0	0	1	0	0	0	0	-0.654585	1	19	24	23	23	12	15	2	4	3	0	3	2	0	3	3	2	1	6	3	179.589	15	15	9.79601	-1	564.46	1	75	34	33	3	2	0	0	2	0
210	BDM332		4	0	0	0	0	1	0	0	0	0	-2.53558	1.174	20	24	11	11	10	11	3	2	1	0	1	2	0	5	4	3	1	6	3	121.274	15	15	9.79601	-1	432.203	1	50	21	19	3	2	0	0	4	0
211	BDM333		4	0	0	0	0	1	0	0	0	0	-3.04708	0.275	17	20	11	11	10	11	2	2	1	0	1	2	0	3	3	2	1	6	3	130.196	15	15	9.79601	-1	398.3	1	51	21	23	3	0	0	1	2	0
212	BDM335		4	0	0	0	0	1	0	0	0	0	-3.48788	1	18	21	11	11	11	12	2	2	1	0	1	2	0	3	3	2	1	6	3	128.942	15	15	9.79601	-1	396.266	1	54	22	25	3	1	0	0	2	0
213	BDM336		4	0	0	0	0	1	0	0	0	0	-3.61258	1	18	21	11	11	11	12	2	2	1	0	1	2	0	3	3	2	1	6	3	128.649	15	15	9.79601	-1	396.266	1	54	22	25	3	1	0	0	2	0
214	BDM340		4	0	0	0	0	1	0	0	0	0	-1.23078	1	16	19	19	21	9	10	2	4	3	0	3	2	3	6	3	2	1	6	3	155.379	15	15	9.79601	-1	466.359	1	62	29	27	3	0	0	0	2	0
215	BDN11		3	0	0	0	1	0	0	0	0	0	0.982274	1	14	18	17	17	7	9	2	3	2	0	2	2	0	3	3	2	1	6	3	139.551	15	15	3.47749	-1	478.145	0	50	24	19	3	0	0	0	2	0
216	BDN13		3	0	0	0	1	0	0	0	0	0	-0.255487	3.345	17	21	17	17	10	12	2	3	2	0	2	2	0	3	3	2	1	6	3	142.353	8.9586	12.5766	3.47749	-1	461.274	0	56	25	22	3	3	0	0	2	0
217	BDN23		3	0	0	0	1	0	0	0	0	0	0.329974	1	14	18	17	17	7	9	2	3	2	0	2	2	0	3	3	2	1	6	3	132.145	15	15	3.4775	-1	417.239	0	50	24	19	3	0	0	0	3	0
218	BDN37		3	0	0	0	1	0	0	0	0	0	0.936274	1	13	17	20	21	6	8	2	4	2	0	2	2	2	5	4	2	2	6	3	145.268	15	15	3.47745	-1	455.331	0	53	26	20	3	0	0	1	2	0
219	BDN57		3	0	0	0	1	0	0	0	0	0	2.41836	0.62	16	20	17	17	9	11	2	3	2	0	2	2	0	3	3	2	1	6	3	154.069	7.2843	15	3.47734	-1	483.13	-1	50	24	17	3	1	0	0	2	2
220	BDN71		3	0	0	0	1	0	0	0	0	0	-0.861126	1	13	17	16	16	6	8	2	3	1	0	1	2	0	3	4	2	2	6	3	124.319	15	15	3.47678	-1	389.21	0	47	22	18	3	1	0	0	2	0
221	BDN85		3	0	0	0	1	0	0	0	0	0	1.88637	1	14	19	23	23	7	10	2	4	3	0	3	2	0	3	3	2	1	6	3	161.173	15	15	3.47831	-1	489.373	0	63	31	26	3	0	0	0	2	0
222	BDN153		0	1	0	0	0	0	0	0	0	0	0.269143	0.62	14	18	17	17	7	9	2	3	2	0	2	2	0	3	3	2	1	6	3	133.909	8.98096	15	3.4775	-1	415.248	0	51	24	20	3	1	0	0	2	0
223	BDN163		4	0	0	0	0	1	0	0	0	0	-1.88905	1	20	24	17	17	13	15	2	3	2	0	2	2	0	3	3	2	1	6	3	172.293	15	15	9.25671	3.4775	501.405	1	69	29	32	4	1	0	0	2	0
224	BDN182		3	0	0	0	1	0	0	0	0	0	1.22647	1	15	19	17	17	8	10	2	3	2	0	2	2	0	3	3	2	1	6	3	141.538	15	15	3.47749	-1	468.139	0	50	24	18	3	0	0	0	2	2
225	BDN191		0	1	0	0	0	0	0	0	0	0	0.325293	19.82	16	20	17	17	9	11	2	3	2	0	2	2	0	3	3	2	1	6	3	150.022	3.95399	15	3.30107	-1	442.251	-1	52	25	19	3	2	0	0	2	0
226	BDN223		3	0	0	0	1	0	0	0	0	0	1.20897	1	19	24	23	23	12	15	2	4	3	0	3	2	0	3	3	2	1	6	3	175.93	15	15	3.47741	-1	565.425	0	72	33	30	3	3	0	0	2	0
227	BDN238		4	0	0	0	0	1	0	0	0	0	-1.93222	0.705	15	19	16	16	8	10	2	3	1	0	1	2	0	3	4	2	2	6	3	131.013	13.778	15	3.47677	-1	419.237	0	51	23	20	3	2	0	0	2	0
228	BDN239		3	0	0	0	1	0	0	0	0	0	0.0772739	1	16	20	17	17	9	11	2	3	2	0	2	2	0	3	3	2	1	6	3	138.608	15	15	3.47741	-1	447.265	0	54	25	21	3	1	0	0	3	0
229	BDN240		3	0	0	0	1	0	0	0	0	0	0.791974	1	17	21	17	17	10	12	2	3	2	0	2	2	0	3	3	2	1	6	3	138.4	15	15	3.47741	-1	465.256	0	54	25	20	3	1	0	0	4	0
230	BDN241		3	0	0	0	1	0	0	0	0	0	1.52137	1	17	21	17	17	10	12	2	3	2	0	2	2	0	3	3	2	1	6	3	153.637	15	15	3.47741	-1	587.067	0	54	25	20	3	1	0	0	2	0
231	BDN242		3	0	0	0	1	0	0	0	0	0	0.675674	0.37	18	22	17	17	11	13	2	3	2	0	2	2	0	3	3	2	1	6	3	158.217	15	15	3.47749	-1	585.198	0	58	26	23	3	2	0	0	2	0
232	BDN243		3	0	0	0	1	0	0	0	0	0	1.12487	1	15	19	17	17	8	10	2	3	2	0	2	2	0	3	3	2	1	6	3	142.011	15	15	3.47748	-1	427.302	0	56	26	24	3	0	0	0	2	0
233	BDN245		3	0	0	0	1	0	0	0	0	0	0.0772739	1	16	20	17	17	9	11	2	3	2	0	2	2	0	3	3	2	1	6	3	138.608	15	15	3.4774	-1	447.265	0	54	25	21	3	1	0	0	3	0
234	BDN246		4	0	0	0	0	1	0	0	0	0	1.31517	1	16	20	17	17	9	11	2	3	2	0	2	2	0	3	3	2	1	6	3	141.991	15	15	3.47735	-1	465.711	0	53	25	20	3	0	0	0	3	1
235	CDr15		1	0	1	0	0	0	0	0	0	0	-0.288249	1	18	22	17	17	11	13	2	3	2	0	2	2	0	3	3	2	1	6	3	152.649	15.5798	15	3.63589	2.96264	472.343	0	62	27	27	4	1	0	0	2	0
236	BTV		5	0	0	0	0	0	1	0	0	0	4.02358	1	17	24	35	35	10	15	2	6	4	0	4	2	0	3	4	2	2	6	3	222.986	12.0973	14.3077	2.69304	-1	728.997	1	87	40	35	7	0	1	0	2	1
237	ER Thermo Yellow		1	0	1	0	0	0	0	0	0	0	1.86567	9.969	22	26	17	17	15	17	2	3	2	0	2	2	0	3	3	2	1	6	3	147.142	9.42918	14.0789	-1	-1	541.283	0	60	27	21	3	3	0	0	5	0
238	ERThermAC		1	0	1	0	0	0	0	0	0	0	2.45678	9.969	23	27	17	17	16	18	2	3	2	0	2	2	0	3	3	2	1	6	3	151.895	9.42912	13.2321	-1	-1	575.728	0	60	27	20	3	3	0	0	5	1
239	CDb12		6	0	0	0	0	0	0	1	0	0	2.86015	7.305	14	20	28	28	6	10	2	5	4	1	3	0	0	3	3	1	2	6	3	169.939	15	15	7.92152	0.941902	559.603	1	69	32	27	6	4	0	0	0	0
240	MTY		5	0	0	0	0	0	1	0	0	0	4.91147	1	17	19	20	22	11	13	1	4	3	0	3	0	3	3	2	1	1	6	3	191.325	15	15	9.51163	2.24287	497.722	2	80	33	43	3	1	0	0	0	0
241	CDy6		4	0	0	0	0	1	0	0	0	0	1.40786	3.975	32	35	11	11	25	26	2	2	1	0	1	2	0	3	3	2	1	6	3	188.595	15.4461	15	8.50886	-1.94625	593.585	1	91	34	48	4	2	0	0	2	0
242	BNM490		1	0	1	0	0	0	0	0	0	0	-2.38321	1	34	42	28	28	20	24	4	5	2	0	2	4	0	6	7	4	3	6	3	253.195	12.1083	15.2904	2.72499	-1	863.914	0	102	43	40	9	3	0	0	4	1
243	ETG		1	0	1	0	0	0	0	0	0	0	-2.16347	9.8	15	18	11	11	8	9	2	2	1	0	1	2	0	3	3	2	1	6	3	111.908	14.0793	15	-1	-1	353.177	0	44	19	18	3	1	0	0	2	0
244	DTG		3	0	0	0	1	0	0	0	0	0	1.63513	5.525	24	27	11	11	17	18	2	2	1	0	1	2	0	3	3	2	1	6	3	153.343	13.9145	15	-1	-1	479.419	0	71	28	36	3	1	0	0	2	0
245	GTG		2	0	0	1	0	0	0	0	0	0	1.51258	16.55	39	42	11	11	32	33	2	2	1	0	1	2	0	3	3	2	1	6	3	211.494	13.1546	13.801	-1.63347	-1	692.694	0	105	39	55	4	4	0	0	2	0
246	MTG		5	0	0	0	0	0	1	0	0	0	3.61763	3.335	19	25	29	29	12	16	2	5	4	0	4	2	0	3	3	2	1	6	3	206.626	13.9144	15	-1	-1	656.54	1	86	40	38	3	1	1	0	2	0
247	LTG		4	0	0	0	0	1	0	0	0	0	-3.38116	26.575	27	31	11	11	14	16	3	2	1	0	1	2	0	3	4	3	1	6	3	156.614	13.8821	15.4866	6.22007	-1	523.388	1	70	27	32	5	3	0	0	2	0
248	NTG		6	0	0	0	0	0	0	1	0	0	1.36699	10.15	31	38	35	37	18	23	3	7	4	0	4	2	4	7	6	3	3	6	3	299.103	11.1598	12.0884	7.87004	5.69963	889.833	1	118	50	52	10	3	0	0	2	0
249	ER-BZT		1	0	1	0	0	0	0	0	0	0	6.86326	13.1891	12	16	31	33	9	12	1	6	5	0	5	0	4	5	2	1	1	6	3	178.155	10.3999	15	2.03366	-1	603.709	0	68	34	25	3	4	0	2	0	0
250	Lyso-V		4	0	0	0	0	1	0	0	0	0	-2.43287	10.15	16	20	11	11	3	5	3	2	1	0	1	2	0	3	4	3	1	6	3	114.472	15	15	5.57829	-1	367.204	1	47	20	20	3	1	0	0	2	0
251	Compound 1		5	0	0	0	0	0	1	0	0	0	5.31623	3.97	20	27	39	40	13	18	2	7	5	0	5	2	2	5	4	2	2	6	3	242.786	15.5215	15	-1	-1	801.657	1	100	48	41	4	3	1	0	2	0
252	ER-Tracker™ Red (BODIPY™ TR Glibenclamide)		1	0	1	0	0	0	0	0	0	0	3.86602	23.395	35	42	28	28	22	27	3	5	4	1	3	2	0	3	4	2	2	6	3	240.895	4.32018	11.3392	-1.41813	-1	914.224	-1	104	44	41	6	7	0	2	2	1
253	ER-Tracker™ Green (BODIPY™ FL Glibenclamide)		1	0	1	0	0	0	0	0	0	0	2.13016	23.47	37	42	17	17	24	27	3	3	3	1	2	2	0	3	3	2	1	6	3	206.4	4.31999	12.1135	7.68502	-1.4179	782.087	-1	95	37	41	6	6	0	1	2	1
254	LysoTracker™ Red DND-99		4	0	0	0	0	1	0	0	0	0	-4.31864	8.935	19	22	10	10	12	13	2	2	0	0	0	2	0	3	4	2	2	6	3	124.076	15.5114	15	8.50886	-1.94625	400.257	1	54	20	25	5	1	0	0	2	0
255	LysoTracker™ Yellow HCK-123		4	0	0	0	0	1	0	0	0	0	-0.0754518	12.545	17	17	9	10	17	17	0	2	1	0	1	0	2	2	1	0	1	6	2	109.145	14.4471	15.7887	8.50886	0.280045	365.411	1	51	16	25	6	4	0	0	0	0
256	LysoTracker™ Green DND-26		4	0	0	0	0	1	0	0	0	0	-4.05654	9.105	21	23	5	5	14	14	2	1	0	0	0	2	0	3	3	2	1	6	3	114.617	15.5489	15	8.50886	-1.94625	363.236	1	52	18	26	4	1	0	0	2	0
257	LysoTracker™ Blue DND-22		4	0	0	0	0	1	0	0	0	0	-1.39108	17.13	14	14	14	16	14	14	0	3	3	0	3	0	3	3	0	0	0	6	3	144.322	15	15	9.96686	9.36193	380.575	2	64	24	36	4	0	0	0	0	0
258	LysoSensor™ Yellow/Blue DND-160		4	0	0	0	0	1	0	0	0	0	-0.0945018	11.405	10	12	17	17	10	12	0	3	1	0	1	0	0	0	2	0	2	6	1	123.028	14.9027	15	8.50878	3.53026	367.427	1	50	20	23	4	3	0	0	0	0
259	LysoSensor™ Green DND-153		4	0	0	0	0	1	0	0	0	0	1.48638	2.44	7	7	20	24	7	7	0	5	3	0	3	0	5	5	2	0	2	6	5	129.633	15	15	8.86904	-0.22867	357.434	1	48	22	21	4	1	0	0	0	0
260	LysoSensor™ Green DND-189		4	0	0	0	0	1	0	0	0	0	2.63674	11.997	10	11	20	24	4	5	1	5	3	0	3	0	5	5	3	1	2	6	5	127.691	15	15	6.86293	-0.184154	398.463	1	52	24	22	4	2	0	0	0	0
261	LysoSensor™ Blue DND-167		4	0	0	0	0	1	0	0	0	0	2.24097	0.93	14	16	14	16	2	4	2	3	3	0	3	0	3	3	2	2	0	6	3	136.227	15	15	8.16002	7.52235	378.513	2	58	24	30	2	2	0	0	0	0
262	LysoSensor™ Blue DND-192		4	0	0	0	0	1	0	0	0	0	-0.877913	0.23	8	8	14	16	8	8	0	3	3	0	3	0	3	3	0	0	0	6	3	118.078	15	15	10.0909	9.48308	294.439	2	48	20	26	2	0	0	0	0	0
263	MitoTracker™ Orange CMTMRos		5	0	0	0	0	0	1	0	0	0	1.07409	1.685	8	9	20	22	8	9	0	4	3	0	3	0	3	3	1	0	1	6	3	141.536	15	15	3.39676	-1	391.919	1	52	24	24	2	1	0	0	0	1
264	MitoTracker™ Orange CM-H2TMRos		5	0	0	0	0	0	1	0	0	0	5.81606	3.98377	10	13	18	18	8	9	1	3	3	0	3	0	0	3	1	1	0	6	3	119.346	15	15	4.00038	3.38423	392.927	0	53	24	25	2	1	0	0	0	1
265	MitoTracker™ Red CMXRos		5	0	0	0	0	0	1	0	0	0	2.77615	1	18	25	18	18	2	3	5	3	3	0	3	4	0	7	5	5	0	6	7	171.811	15	15	3.62716	-1	496.071	1	68	32	32	2	1	0	0	0	1
266	MitoTracker™ Red CM-H2XRos		5	0	0	0	0	0	1	0	0	0	7.75378	3.21042	18	25	18	18	2	3	5	3	3	0	3	4	0	7	5	5	0	6	7	150.988	15	15	4.21893	3.60366	497.078	0	69	32	33	2	1	0	0	0	1
267	MitoTracker™ Red FM		5	0	0	0	0	0	1	0	0	0	6.92006	2.75	19	23	27	28	16	19	1	5	4	0	4	0	2	4	2	1	1	6	2	211.571	15	15	1.94137	-1	688.545	1	82	39	36	3	0	0	0	0	4
268	MitoTracker™ Deep Red FM		5	0	0	0	0	0	1	0	0	0	5.86887	6.335	19	23	18	18	13	15	2	3	3	0	3	0	0	4	2	2	0	6	2	173.994	15	15	1.9414	-1	508.125	1	73	34	36	2	0	0	0	0	1
269	Nonyl acridine orange		5	0	0	0	0	0	1	0	0	0	2.61278	1	15	15	14	16	15	15	0	3	2	0	2	0	3	3	1	0	1	6	3	128.448	15	15	2.8138	1.8626	392.606	1	67	26	38	3	0	0	0	0	0
270	Dihydrorhodamine 123		5	0	0	0	0	0	1	0	0	0	3.35842	5.62909	8	11	18	18	6	7	1	3	3	0	3	0	0	3	1	1	0	6	3	102.048	15	15	3.81309	3.05374	346.385	0	44	21	18	2	3	0	0	0	0
271	DASPEI		5	0	0	0	0	0	1	0	0	0	-0.616184	1.07	7	8	12	12	7	8	0	2	1	0	1	0	0	0	1	0	1	6	1	84.4909	15	15	4.71442	-1	253.366	1	40	17	21	2	0	0	0	0	0
272	JC-1 Dye		5	0	0	0	0	0	1	0	0	0	4.28074	16.46	18	20	15	16	15	16	1	3	2	0	2	0	2	4	2	1	1	6	2	165.093	15	15	0.389747	-1	525.327	1	60	25	27	4	0	0	0	0	4
273	JC-9 Dye		5	0	0	0	0	0	1	0	0	0	4.41404	7.34429	17	18	12	12	17	18	0	2	2	0	2	0	0	0	0	0	0	6	1	112.775	9.03653	15	-1	-1	396.439	0	53	23	24	0	6	0	0	0	0
274	BODIPY™ FL C5-Ceramide		2	0	0	1	0	0	0	0	0	0	2.39997	7.88	38	40	5	5	31	31	2	1	0	0	0	2	0	3	3	2	1	6	3	176.756	13.2849	14.1416	-1.04919	-1	601.625	0	97	34	54	3	3	0	0	2	0
275	BODIPY™ FL C5-Lactosylceramide		2	0	0	1	0	0	0	0	0	0	-2.08059	17.83	62	66	5	5	43	45	4	1	0	0	0	2	0	3	5	4	1	6	3	251.403	12.1505	12.4529	-1.04939	-1	953.963	0	145	48	78	3	13	0	0	2	0
276	BODIPY™ TR Ceramide		2	0	0	1	0	0	0	0	0	0	2.46282	8.755	34	38	16	16	27	29	2	3	1	0	1	2	0	3	4	2	2	6	3	201.188	12.6843	14.0903	-1	-1	705.708	0	100	39	50	3	4	0	1	2	0
277	BODIPY™ FL C5-Sphingomyelin		2	0	0	1	0	0	0	0	0	0	0.33165	34.105	48	50	5	5	41	41	2	1	0	0	0	2	0	3	3	2	1	6	3	224.923	1.86515	13.299	-1.05046	-1	766.754	0	119	39	66	4	6	1	0	2	0
278	BODIPY™ FL C12-Sphingomyelin		2	0	0	1	0	0	0	0	0	0	3.10575	30.78	55	57	5	5	48	48	2	1	0	0	0	2	0	3	3	2	1	6	3	257.13	1.86516	13.4992	-1.0502	-1	864.941	0	140	46	80	4	6	1	0	2	0
279	DiIC16		7	0	0	0	0	0	0	0	1	0	16.3474	1	45	48	12	12	39	40	2	2	2	0	2	0	0	4	2	2	0	6	2	267.368	15	15	2.55772	-1	778.321	1	146	55	89	2	0	0	0	0	0
280	NBD C6-Ceramide		2	0	0	1	0	0	0	0	0	0	6.2376	9.695	32	32	9	10	32	32	0	2	1	0	1	0	2	2	1	0	1	6	2	162.082	13.3393	14.0178	0.19989	-1.04895	575.747	0	90	30	49	5	6	0	0	0	0
281	7-AAD		8	0	0	0	0	0	0	0	0	1	-0.766897	56.6014	77	81	14	16	39	41	4	3	2	0	2	4	3	7	5	4	1	16	3	331.131	10.5412	10.8637	2.18532	-1.41246	1270.45	0	178	62	87	13	16	0	0	0	0
282	ACMA		6	0	0	0	0	0	0	1	0	0	2.09906	4.185	4	4	14	16	4	4	0	3	2	0	2	0	3	3	1	0	1	6	3	73.7836	15	15	8.485	-1	259.715	1	30	14	12	2	1	0	0	0	1
283	BOBO-1		8	0	0	0	0	0	0	0	0	1	-11.1233	27.855	31	34	18	20	19	22	2	4	2	0	2	0	4	4	4	2	2	6	2	258.177	15	15	5.84701	5.24495	695.038	4	103	41	54	6	0	0	2	0	0
284	BOBO-3		8	0	0	0	0	0	0	0	0	1	-10.1357	25.955	35	38	18	20	23	26	2	4	2	0	2	0	4	4	4	2	2	6	2	278.814	15	15	6.67926	6.0772	747.113	4	111	45	58	6	0	0	2	0	0
285	Hoechst 33258		6	0	0	0	0	0	0	1	0	0	3.6265	0.925	8	11	24	26	2	5	1	5	3	0	3	0	4	4	3	1	2	6	2	157.559	9.62465	11.2623	7.86692	5.782	425.512	1	57	25	25	6	1	0	0	0	0
286	TO-PRO-3 Iodide		8	0	0	0	0	0	0	0	0	1	-3.32064	15.985	15	17	15	16	11	12	1	3	2	0	2	0	2	4	2	1	1	6	2	154.133	15	15	0.922549	-1	417.611	2	61	26	31	3	0	0	1	0	0
287	TOTO-1		8	0	0	0	0	0	0	0	0	1	-7.80729	26.395	27	32	30	32	19	22	2	6	4	0	4	0	4	8	4	2	2	6	2	290.525	15	15	1.074	0.471938	795.157	4	115	49	58	6	0	0	2	0	0
288	TOTO-3		8	0	0	0	0	0	0	0	0	1	-6.75285	24.495	31	36	30	32	23	26	2	6	4	0	4	0	4	8	4	2	2	6	2	311.162	15	15	1.22357	0.621513	847.233	4	123	53	62	6	0	0	2	0	0
289	YO-PRO-1		8	0	0	0	0	0	0	0	0	1	-4.64147	16.935	13	15	15	16	9	10	1	3	2	0	2	0	2	4	2	1	1	6	2	139.409	15	15	0.738176	-1	375.512	2	57	24	29	3	1	0	0	0	0
290	YO-PRO-3		8	0	0	0	0	0	0	0	0	1	-4.11425	15.985	15	17	15	16	11	12	1	3	2	0	2	0	2	4	2	1	1	6	2	149.727	15	15	0.92233	-1	401.55	2	61	26	31	3	1	0	0	0	0
291	YOYO-1		8	0	0	0	0	0	0	0	0	1	-9.3945	26.395	27	32	30	32	19	22	2	6	4	0	4	0	4	8	4	2	2	6	2	281.714	15	15	1.0392	0.437141	763.036	4	115	49	58	6	2	0	0	0	0
292	YOYO-3		8	0	0	0	0	0	0	0	0	1	-8.34007	24.495	31	36	30	32	23	26	2	6	4	0	4	0	4	8	4	2	2	6	2	302.351	15	15	1.22335	0.621294	815.111	4	123	53	62	6	2	0	0	0	0
293	PTG		7	0	0	0	0	0	0	0	1	0	-3.03041	36.555	76	81	21	21	69	72	2	4	1	0	1	2	0	3	5	2	3	6	3	455.986	-1.19126	-0.911215	8.93193	0.748813	1395.73	1	216	71	119	13	8	0	2	2	0
294	MemGlow™ 488		7	0	0	0	0	0	0	0	1	0	-1.35262	30.26	69	73	15	15	62	64	2	3	0	0	0	2	0	3	5	2	3	6	3	382.138	-1.15049	-0.680603	8.177	0.421551	1218.5	0	190	61	106	11	7	0	2	2	0
295	MemGlow™ 560		7	0	0	0	0	0	0	0	1	0	7.58828	29.17	67	72	22	22	61	64	2	4	2	0	2	0	0	4	4	2	2	6	2	426.626	-1.19994	-0.645844	2.36697	0.677886	1270.89	1	206	71	117	10	6	0	2	0	0
296	MemGlow™ 590		7	0	0	0	0	0	0	0	1	0	9.56724	26.93	67	72	30	32	61	64	2	6	4	0	4	0	4	6	4	2	2	6	3	459.526	-1.19985	-0.645612	2.43606	0.679467	1371.01	1	218	79	121	10	6	0	2	0	0
297	MemGlow™ 640		7	0	0	0	0	0	0	0	1	0	8.1155	28.22	69	74	22	22	63	66	2	4	2	0	2	0	0	4	4	2	2	6	2	436.945	-1.19993	-0.645806	2.39392	0.678357	1296.93	1	210	73	119	10	6	0	2	0	0
298	MemGlow™ 700		7	0	0	0	0	0	0	0	1	0	10.0945	25.98	69	74	30	32	63	66	2	6	4	0	4	0	4	6	4	2	2	6	3	469.845	-1.19984	-0.645579	2.46312	0.67987	1397.05	1	222	81	123	10	6	0	2	0	0
299	14 from original reference		2	0	0	1	0	0	0	0	0	0	5.14714	20.295	38	42	6	6	21	23	4	1	3	2	1	4	0	4	2	2	0	6	2	170.755	5.26267	13.481	-1.01724	-1.93037	626.812	0	90	32	46	6	5	0	1	0	0
300	25 from original reference		2	0	0	1	0	0	0	0	0	0	5.67003	6.06143	26	30	6	6	11	14	4	1	3	2	1	2	0	2	2	2	0	6	2	128.117	15	15	-1	-1	556.437	0	65	25	33	0	6	0	0	0	0
301	ANQ-IMC-6		2	0	0	1	0	0	0	0	0	0	8.0955	7.27465	17	21	35	38	17	19	0	7	6	0	5	0	6	7	2	0	2	6	5	205.837	15.583	15	3.65433	0.829419	708.258	0	90	43	38	5	3	0	0	0	1
302	Niblue-C6-IMC		2	0	0	1	0	0	0	0	0	0	3.50112	8.555	20	22	33	37	20	22	0	7	5	0	5	0	6	6	2	0	2	6	4	227.926	15.5194	15	3.76628	-1.55716	729.296	1	96	43	43	5	4	0	0	0	1
303	FC-ONOO		2	0	0	1	0	0	0	0	0	0	3.79615	16.8743	18	21	16	17	10	12	2	3	3	0	3	0	2	3	2	2	0	6	3	122.252	10.0754	15	-1	-1	478.325	0	57	24	23	2	6	0	1	0	0
304	CPH		2	0	0	1	0	0	0	0	0	0	4.65853	22.285	29	34	18	18	17	20	3	3	4	1	3	0	0	4	2	2	0	6	2	212.734	10.809	15	2.26217	-0.69834	647.896	1	94	40	47	4	2	0	1	0	0
305	TP-Golgi		2	0	0	1	0	0	0	0	0	0	3.24936	18.415	16	19	22	23	13	15	1	4	4	0	4	0	2	3	1	1	0	6	3	166.084	10.2666	15.4743	-1	-1	524.656	1	68	31	30	3	3	0	1	0	0
306	Gol-NH		2	0	0	1	0	0	0	0	0	0	2.47608	23.42	12	14	16	17	9	10	1	3	3	0	3	0	2	3	1	1	0	6	3	102.885	10.0753	15	1.78151	-0.859877	393.376	0	39	18	11	5	4	0	1	0	0
307	EW2		2	0	0	1	0	0	0	0	0	0	1.55903	28.6161	11	13	16	17	8	9	1	3	3	0	3	0	2	3	1	1	0	6	3	102.304	10.0756	15	5.13807	-1.98825	382.393	0	41	18	14	4	4	0	1	0	0
308	Dns-LLC		2	0	0	1	0	0	0	0	0	0	2.62088	27.2454	29	29	10	11	29	29	0	2	2	0	2	0	2	2	0	0	0	6	2	156.06	9.6131	10.2161	4.62763	-1	579.771	0	80	27	41	5	5	0	2	0	0
309	CCA		2	0	0	1	0	0	0	0	0	0	-2.37635	18.1949	13	13	6	6	13	13	0	1	1	0	1	0	0	0	0	0	0	6	1	72.0454	3.37143	9.16061	-0.703588	-1	283.298	-1	32	12	13	1	5	0	1	0	0
310	Golgi-P		2	0	0	1	0	0	0	0	0	0	-0.852491	17.765	35	39	12	12	20	23	3	2	3	1	2	0	0	2	2	2	0	6	2	196.906	3.61672	10.0494	2.02175	-1	681	-1	83	35	36	2	5	0	1	2	1
311	1 from original reference		2	0	0	1	0	0	0	0	0	0	1.79544	23.2974	21	26	32	33	18	22	1	6	2	0	2	0	2	3	5	1	4	6	3	206.496	9.93245	11.5664	5.19864	4.59651	731.787	1	86	36	33	11	5	0	1	0	0
312	pH-PTT		2	0	0	1	0	0	0	0	0	0	8.69925	24.975	26	30	20	22	14	16	3	4	5	1	4	0	4	6	2	2	0	6	3	215.537	4.40637	15	0.947199	-1	627.224	0	85	41	39	2	2	0	0	0	1
313	RSG		2	0	0	1	0	0	0	0	0	0	9.18795	1.385	38	42	18	18	34	34	2	3	3	0	3	0	0	5	2	2	0	6	5	248.069	14.109	15.1827	8.64451	4.6583	768.113	1	127	48	71	4	4	0	0	0	0
314	1a from original reference		2	0	0	1	0	0	0	0	0	0	4.21287	3.32128	5	6	16	17	5	6	0	3	2	0	2	0	2	2	1	0	1	6	2	75.4176	15	15	3.24207	-0.628418	288.271	0	32	16	11	2	0	0	0	3	0
315	1b from original reference		2	0	0	1	0	0	0	0	0	0	5.20235	2.32867	5	6	20	22	5	6	0	4	3	0	3	0	4	4	1	0	1	6	2	91.8678	15	15	3.23777	-0.624906	338.331	0	38	20	13	2	0	0	0	3	0
316	Gol-H2S		2	0	0	1	0	0	0	0	0	0	5.34815	4.024	7	8	16	17	7	8	0	3	2	0	2	0	2	2	1	0	1	6	2	81.0048	5.37335	15	0.0405694	-1	314.269	0	32	16	9	4	0	0	0	3	0
317	GT-Cys		2	0	0	1	0	0	0	0	0	0	6.66722	4.39821	8	10	22	23	8	10	0	4	3	0	3	0	2	2	1	0	1	6	2	114.972	6.5447	15	0.676808	-1	424.439	0	45	23	15	2	1	0	1	3	0
318	Gol-Cys		2	0	0	1	0	0	0	0	0	0	6.59293	4.75531	11	12	16	17	11	12	0	3	2	0	2	0	2	2	1	0	1	6	2	110.812	6.63071	15	0.786131	-1.71121	406.483	0	44	20	17	2	0	0	2	3	0
319	GT-GSH		2	0	0	1	0	0	0	0	0	0	6.0182	3.84782	16	18	16	17	10	12	1	3	3	1	2	0	2	2	1	0	1	6	2	114.415	12.8526	15	0.41557	-1.16542	440.421	0	51	24	19	2	3	0	0	3	0
320	Gol-CO		2	0	0	1	0	0	0	0	0	0	5.63007	4.64253	11	12	16	17	11	12	0	3	2	0	2	0	2	2	1	0	1	6	2	96.3665	12.8545	15	0.415639	-1.16254	372.346	0	42	20	15	2	2	0	0	3	0
321	ZnDA-1H		2	0	0	1	0	0	0	0	0	0	5.0835	9.33873	27	30	22	23	23	25	1	4	1	0	1	0	2	3	4	1	3	6	3	193.849	15.5198	15	5.21731	4.66311	690.28	0	97	38	48	5	5	0	0	0	1
322	SF-1		2	0	0	1	0	0	0	0	0	0	2.01778	4.145	16	20	17	17	9	11	2	3	2	0	2	2	0	3	3	2	1	6	3	139.948	8.75415	12.1654	-1	-1	444.287	0	56	26	23	2	2	0	0	2	0
323	TPE-Ade		2	0	0	1	0	0	0	0	0	0	6.21829	4.25569	13	18	33	34	8	13	1	6	4	0	4	0	2	2	3	1	2	6	2	201.251	12.4718	14.013	3.93877	-1.05068	627.759	0	79	37	33	5	3	0	1	0	0
324	BAOA		2	0	0	1	0	0	0	0	0	0	2.42966	5.41889	23	29	16	17	5	6	5	3	2	0	2	4	2	8	6	5	1	6	4	151.393	-1.13454	15	4.00108	3.37945	546.637	-1	69	30	30	2	6	0	1	0	0
325	Nap-Cys		1	0	1	0	0	0	0	0	0	0	3.64793	17.0306	17	19	16	17	14	15	1	3	3	0	3	0	2	3	1	1	0	6	3	122.627	10.3999	15	-1	-1	464.492	0	53	24	20	2	6	0	1	0	0
326	Na-H2S-ER		1	0	1	0	0	0	0	0	0	0	3.35736	21.995	15	17	16	17	12	13	1	3	3	0	3	0	2	3	1	1	0	6	3	117.134	10.3999	15	-1	-1	435.456	0	48	21	17	5	4	0	1	0	0
327	SNCL		1	0	1	0	0	0	0	0	0	0	2.09574	26.945	30	33	16	17	21	23	2	3	3	0	3	0	2	3	2	2	0	6	3	183.797	10.4055	15.1447	8.50866	-1	650.768	1	86	33	40	5	7	0	1	0	0
328	ERNT		1	0	1	0	0	0	0	0	0	0	8.01983	11.9143	13	18	34	35	10	14	1	6	6	0	6	0	2	3	1	1	0	6	3	185.143	10.3999	15	-1	-1	637.751	0	78	39	31	3	4	0	1	0	0
329	ER-H		1	0	1	0	0	0	0	0	0	0	4.68315	15.365	21	25	22	23	12	15	2	4	4	0	4	0	2	3	2	2	0	6	3	182.822	10.4014	15	7.91945	-1	618.169	1	77	33	34	4	4	0	1	0	1
330	ER-Nap-NO		1	0	1	0	0	0	0	0	0	0	3.66201	15.0246	14	17	22	23	11	13	1	4	4	0	4	0	2	3	1	1	0	6	3	140.033	10.3999	15	3.30021	-1	500.571	0	60	27	24	4	4	0	1	0	0
331	ER-H2O2		1	0	1	0	0	0	0	0	0	0	4.6974	15.9082	21	24	16	17	13	15	2	3	3	0	3	0	2	3	2	2	0	6	3	136.502	10.3999	15	-1	-1	520.406	0	66	27	29	2	6	0	1	0	0
332	ER-NPA		1	0	1	0	0	0	0	0	0	0	3.7221	15.0324	14	17	22	23	11	13	1	4	4	0	4	0	2	3	1	1	0	6	3	137.788	10.3999	15	4.24199	-1	501.556	0	59	27	23	3	5	0	1	0	0
333	TPER-O2˙−		1	0	1	0	0	0	0	0	0	0	4.26175	19.8162	20	22	16	17	17	18	1	3	3	0	3	0	2	3	1	1	0	6	3	122.03	10.3999	15	-1	-1	542.5	0	53	22	17	2	7	0	2	3	0
334	ER-DTT		1	0	1	0	0	0	0	0	0	0	3.67926	16.941	14	16	16	17	11	12	1	3	3	0	3	0	2	3	1	1	0	6	3	119.605	10.3999	15	-1	-1	440.531	0	50	22	20	2	4	0	2	0	0
335	1a from original reference		1	0	1	0	0	0	0	0	0	0	1.46586	11.8859	18	19	16	17	18	19	0	3	2	0	2	0	2	2	1	0	1	6	2	131.028	3.41074	10.3779	4.34081	-1	486.582	-1	64	25	30	2	6	0	1	0	0
336	2 from original reference		1	0	1	0	0	0	0	0	0	0	0.726489	11.335	25	28	11	11	15	17	2	2	2	1	1	2	0	2	2	1	1	6	2	153.468	12.5924	14.6566	8.56628	0.762099	500.524	1	64	25	28	5	4	0	0	2	0
337	5 from original reference		1	0	1	0	0	0	0	0	0	0	-2.74134	11.815	22	26	16	16	15	17	2	3	1	0	1	2	0	3	4	2	2	6	3	146.966	12.7677	14.6175	0.75697	-1.51944	528.315	0	63	25	25	6	2	0	0	4	0
338	3 from original reference		1	0	1	0	0	0	0	0	0	0	1.64917	11.335	25	28	11	11	15	17	2	2	2	1	1	2	0	2	2	1	1	6	2	162.645	12.6697	13.2403	8.56629	0.762102	533.433	1	64	25	28	5	4	0	0	0	2
339	6 from original reference		1	0	1	0	0	0	0	0	0	0	-1.98435	11.815	22	26	16	16	15	17	2	3	1	0	1	2	0	3	4	2	2	6	3	156.143	12.888	14.6219	0.756973	-1.51942	561.224	0	63	25	25	6	2	0	0	2	2
340	14 from original reference		1	0	1	0	0	0	0	0	0	0	10.7132	6.32853	38	40	21	22	38	40	0	4	2	0	2	0	2	2	2	0	2	6	2	233.25	8.91825	15	3.55278	-0.241245	823.901	0	109	44	50	5	5	0	0	5	0
341	21 from original reference		1	0	1	0	0	0	0	0	0	0	8.98485	13.7647	40	42	21	22	40	42	0	4	2	0	2	0	2	2	2	0	2	6	2	231.486	8.91823	13.3353	3.55253	-0.241243	862.935	0	116	43	55	6	7	0	0	5	0
342	ER-tracker Blue-White DPX		1	0	1	0	0	0	0	0	0	0	4.24897	19.6511	17	20	23	23	17	20	0	4	3	0	3	0	0	0	1	0	1	6	1	160.001	10.6454	15	3.93747	2.85024	580.528	0	61	26	21	4	4	0	1	5	0
343	3q from original reference		1	0	1	0	0	0	0	0	0	0	4.10991	6.05379	7	10	20	21	5	6	1	4	2	0	2	0	2	4	3	1	2	6	4	118.105	9.74638	12.8564	4.46286	-1	394.921	0	46	21	19	4	0	0	1	0	1
344	3t from original reference		1	0	1	0	0	0	0	0	0	0	4.19673	6.39796	12	15	20	21	10	11	1	4	2	0	2	0	2	4	3	1	2	6	4	120.069	9.72281	12.9623	-1	-1	457.469	0	50	23	18	3	2	0	1	3	0
345	NH2-BODIPY		1	0	1	0	0	0	0	0	0	0	-0.926776	4.4	16	19	11	11	9	10	2	2	1	0	1	2	0	3	3	2	1	6	3	99.2729	15	15	1.95291	-1	451.935	0	33	15	6	3	0	0	0	7	0
346	ABAH-LW		1	0	1	0	0	0	0	0	0	0	7.3624	10.5983	16	19	21	22	11	14	1	4	3	0	3	0	2	2	2	1	1	6	2	152.577	13.695	15	1.74444	-1	534.863	0	65	28	28	2	4	0	1	0	1
347	NRERCl		1	0	1	0	0	0	0	0	0	0	3.62175	9.13328	14	14	18	21	14	14	0	4	3	0	3	0	4	4	1	0	1	6	4	130.742	15.3481	15	4.14151	-1.03723	451.952	0	58	25	26	3	3	0	0	0	1
348	TPFL-ER		1	0	1	0	0	0	0	0	0	0	4.56916	3.97067	13	16	17	17	12	13	1	3	3	1	2	0	0	3	1	0	1	6	3	144.782	15	15	0.919107	-1.46797	422.956	0	57	24	27	4	1	0	0	0	1
349	probe 1 from original reference		1	0	1	0	0	0	0	0	0	0	4.39692	6.6187	9	10	20	22	9	10	0	4	3	0	3	0	3	3	1	0	1	6	3	111.38	15	15	-0.984988	-1	389.407	0	48	23	19	1	5	0	0	0	0
350	HRA		1	0	1	0	0	0	0	0	0	0	3.76328	4.61456	8	8	14	16	8	8	0	3	2	0	2	0	3	3	1	0	1	6	3	93.2131	15	15	4.22307	-1.96384	296.368	0	42	18	20	2	2	0	0	0	0
[truncated: 755 more columns]

## Sheet: Reference List
Reference	Reference No.
Biotech. Histochem. 2003, 78, 323-332	1
Comb. Chem. High Throughput Screen. 2016, 19, 378-383	2
Sensors 2016, 16, 1397	3
Sci. Rep. 2014, 4, 6701	4
Sci. Rep. 2017, 7, 1383	5
Chem. Commun. 2015, 51, 8044–8047	6
Chem. Commun. 2015,51, 9336-9338	7
J. Am. Chem. Soc. 2013, 135, 9181-9185	8
J. Am. Chem. Soc. 2013, 135, 2903	9
Eur. Biophys. J. 2008, 37, 1317–1328	10
Histochem. 1990, 94, 303-308	11
Histochem. Cell Biol. 2006, 126 165–175	12
J. Microscopy 1991, 163, 233-241	13
https://www.thermofisher.com	14
Color. Technol. 2014, 130, 155–173	15
Adv. Drug Deliver. Rev. 2005, 57, 153–167	16
Chem. Commun. 2010, 46, 436–438	17
Org. Biomol. Chem. 2011, 9, 3615–3618	18
Photochem. Photobiol. 2003, 77, 138–145	19
Malar. J. 2009, 8, 104. doi:10.1186/1475-2875-8-104	20
Cancer Res. 2001, 62, 7219–7229	21
Angew. Chem. Int. Ed. 2011, 50, 4180–4183	22
Biophys. Chem. 2005, 114, 35–41	23
Cytometry 2000, 40, 280–291	24
Chem. Biol. 2006, 13, 615–623	25
J. Am. Chem. Soc. 2008, 130, 7182–7183	26
ChemBioChem 2011, 12, 52–55	27
Bioorgan. Med. Chem. 2009, 17, 4747–4755	28
Schwarz, G.; Wittekind, D. Selected Aminoacridines as Fluorescent Probes in Cytochemistry in General and in the Detection of Cancer Cells in Particular. Anal Quant Cytol 1982, 4 (1), 44–54.	29
Petschel K, Naujok A, Zimmermann HW (1982) Fluorescent staining of chromosomes and nuclear structures in living LM- and HeLa cells with new acridine dyes. Histochemistry 76:219–228	30
Petschel, R.; Irion, G.; Naujok, A.; Vogel, M.; Weidner, J. U.; Zimmermann, H. W. [The vital staining of nuclear chromatin and the chromosomes of HeLa cells with the fluorochrome AMHA binding to DNA]. Histochemistry 1988, 90 (3), 219–232. https://doi.org/10.1007/BF00492511.	31
Schmued, L. C.; Fallon, J. H. Fluoro-Gold: A New Fluorescent Retrograde Axonal Tracer with Numerous Unique Properties. Brain Res 1986, 377 (1), 147–154. https://doi.org/10.1016/0006-8993(86)91199-6.	32
Jeong, Y.-M.; Duanting, Z.; Hennig, H.; Samanta, A.; Agrawalla, B. K.; Bray, M.-A.; Carpenter, A. E.; Chang, Y.-T. CDy6, a Photostable Probe for Long-Term Real-Time Visualization of Mitosis and Proliferating Cells. Chemistry & Biology 2015, 22 (2), 299–307. https://doi.org/10.1016/j.chembiol.2014.11.018.	33
Horobin, R. W.; Rashid, F. Interactions of Molecular Probes with Living Cells and Tissues. Part 1. Some General Mechanistic Proposals, Making Use of a Simplistic Chinese Box Model. Histochemistry 1990, 94 (2), 205–209. https://doi.org/10.1007/BF02440189.	34
Hetherington, D. C. Pinacyanol as A Supra-Vital Mitochondrial Stain for Blood. Stain Technology 1936, 11 (4), 153–154. https://doi.org/10.3109/10520293609110517.	35
Collot, M.; Ashokkumar, P.; Anton, H.; Boutant, E.; Faklaris, O.; Galli, T.; Mély, Y.; Danglot, L.; Klymchenko, A. S. MemBright: A Family of Fluorescent Membrane Probes for Advanced Cellular Imaging and Neuroscience. Cell Chem Biol 2019, 26 (4), 600-614.e7. https://doi.org/10.1016/j.chembiol.2019.01.009.	36
Hyenne, V.; Ghoroghi, S.; Collot, M.; Bons, J.; Follain, G.; Harlepp, S.; Mary, B.; Bauer, J.; Mercier, L.; Busnelli, I.; Lefebvre, O.; Fekonja, N.; Garcia-Leon, M. J.; Machado, P.; Delalande, F.; López, A. A.; Silva, S. G.; Verweij, F. J.; van Niel, G.; Djouad, F.; Peinado, H.; Carapito, C.; Klymchenko, A. S.; Goetz, J. G. Studying the Fate of Tumor Extracellular Vesicles at High Spatiotemporal …	37
Collot, M.; Boutant, E.; Lehmann, M.; Klymchenko, A. S. BODIPY with Tuned Amphiphilicity as a Fluorogenic Plasma Membrane Probe. Bioconjugate Chem. 2019, 30 (1), 192–199. https://doi.org/10.1021/acs.bioconjchem.8b00828.	38
Pagano, R. E.; Martin, O. C.; Kang, H. C.; Haugland, R. P. A Novel Fluorescent Ceramide Analogue for Studying Membrane Traffic in Animal Cells: Accumulation at the Golgi Apparatus Results in Altered Spectral Properties of the Sphingolipid Precursor. Journal of Cell Biology 1991, 113 (6), 1267–1279. https://doi.org/10.1083/jcb.113.6.1267.	39
Pucihar, G.; Kotnik, T.; Miklavcic, D. Measuring the Induced Membrane Voltage with Di-8-ANEPPS. J Vis Exp 2009, No. 33, 1659. https://doi.org/10.3791/1659.	40
Etter, E. F.; Kuhn, M. A.; Fay, F. S. Detection of Changes in Near-Membrane Ca2+ Concentration Using a Novel Membrane-Associated Ca2+ Indicator. Journal of Biological Chemistry 1994, 269 (13), 10141–10149. https://doi.org/10.1016/S0021-9258(17)37001-1.	41
Ladha, S.; Mackie, A. R.; Clark, D. C. Cheek Cell Membrane Fluidity Measured by Fluorescence Recovery after Photobleaching and Steady-State Fluorescence Anisotropy. J. Membarin Biol. 1994, 142 (2), 223–228. https://doi.org/10.1007/BF00234944.	42
Peng, X.; Wu, T.; Fan, J.; Wang, J.; Zhang, S.; Song, F.; Sun, S. An Effective Minor Groove Binder as a Red Fluorescent Marker for Live-Cell DNA Imaging and Quantification. Angewandte Chemie International Edition 2011, 50 (18), 4180–4183. https://doi.org/10.1002/anie.201007386.	43
Donlon, T. A.; Magenis, R. E. Methyl Green Is a Substitute for Distamycin A in the Formation of Distamycin A/DAPI C-Bands. Hum Genet 1983, 65 (2), 144–146. https://doi.org/10.1007/BF00286651.	44
Schweizer, D.; Ambros, P.; Andrle, M. Modification of DAPI Banding on Human Chromosomes by Prestaining with a DNA-Binding Oligopeptide Antibiotic, Distamycin A. Experimental Cell Research 1978, 111 (2), 327–332. https://doi.org/10.1016/0014-4827(78)90177-5.	45
Mezzanotte, R.; Ferrucci, L.; Marchi, A. Methylene-Blue/Coriphosphine-O/Acridine-Orange, Chromosomal DNA and Visible Light: Interaction and Cytological Effect in Drosophila Melanogaster. Genetica 1981, 55 (3), 203–207. https://doi.org/10.1007/BF00127203.	46
Lee, J. W.; Jung, M.; Rosania, G. R.; Chang, Y.-T. Development of Novel Cell-Permeable DNA Sensitive Dyes Using Combinatorial Synthesis and Cell-Based Screening. Chem. Commun. 2003, No. 15, 1852–1853. https://doi.org/10.1039/B303960A.	47
Hull, H. M.; Hoshaw, R. W.; Wang, J.-C. Cytofluorometric Determination of Nuclear DNA in Living and Preserved Algae. Stain Technology 1982, 57 (5), 273–282. https://doi.org/10.3109/10520298209066723.	48
Xiao, H.; Liu, X.; Wu, C.; Wu, Y.; Li, P.; Guo, X.; Tang, B. A New Endoplasmic Reticulum-Targeted Two-Photon Fluorescent Probe for Imaging of Superoxide Anion in Diabetic Mice. Biosensors and Bioelectronics 2017, 91, 449–455. https://doi.org/10.1016/j.bios.2016.12.068	49
Su, D.; Teoh, C. L.; Kang, N.-Y.; Yu, X.; Sahu, S.; Chang, Y.-T. Synthesis and Systematic Evaluation of Dark Resonance Energy Transfer (DRET)-Based Library and Its Application in Cell Imaging. Chemistry – An Asian Journal 2015, 10 (3), 581–585. https://doi.org/10.1002/asia.201403257	50
Kuhry, J.-G.; Fonteneau, P.; Duportail, G.; Maechling, C.; Laustriat, G. TMA-DPH: A Suitable Fluorescence Polarization Probe for Specific Plasma Membrane Fluidity Studies in Intact Living Cells. Cell Biophysics 1983, 5 (2), 129–140. https://doi.org/10.1007/BF02796139.	51
Harata, N.; Ryan, T. A.; Smith, S. J.; Buchanan, J.; Tsien, R. W. Visualizing Recycling Synaptic Vesicles in Hippocampal Neurons by FM 1-43 Photoconversion. Proceedings of the National Academy of Sciences 2001, 98 (22), 12748–12753. https://doi.org/10.1073/pnas.171442798	52
Willem, J.; ter Beest, M.; Scherphof, G.; Hoekstra, D. A Non-Exchangeable Fluorescent Phospholipid Analog as a Membrane Traffic Marker of the Endocytic Pathway. Eur J Cell Biol 1990, 53 (1), 173–184.	53
Widholm, J. M. The Use of Fluorescein Diacetate and Phenosafranine for Determining Viability of Cultured Plant Cells. Stain Technology 1972, 47 (4), 189–194. https://doi.org/10.3109/10520297209116483.	54
Viricel, W.; Mbarek, A.; Leblond, J. Switchable Lipids: Conformational Change for Fast PH-Triggered Cytoplasmic Delivery. Angewandte Chemie International Edition 2015, 54 (43), 12743–12747. https://doi.org/10.1002/anie.201504661.	55
Feoktistova, M.; Geserick, P.; Leverkus, M. Crystal Violet Assay for Determining Viability of Cultured Cells. Cold Spring Harb Protoc 2016, 2016 (4), pdb.prot087379. https://doi.org/10.1101/pdb.prot087379.	56
Horobin, R. W.; Stockert, J. C.; Rashid-Doubell, F. Uptake and Localisation of Small-Molecule Fluorescent Probes in Living Cells: A Critical Appraisal of QSAR Models and a Case Study Concerning Probes for DNA and RNA. Histochem Cell Biol 2013, 139 (5), 623–637. https://doi.org/10.1007/s00418-013-1090-0.	57
Wang, E.; Zhao, E.; Hong, Y.; Y. Lam, J. W.; Zhong Tang, B. A Highly Selective AIE Fluorogen for Lipid Droplet Imaging in Live Cells and Green Algae. Journal of Materials Chemistry B 2014, 2 (14), 2013–2019. https://doi.org/10.1039/C3TB21675F.	58
O’Rourke, E. J.; Soukas, A. A.; Carr, C. E.; Ruvkun, G. C. Elegans Major Fats Are Stored in Vesicles Distinct from Lysosome-Related Organelles. Cell Metab 2009, 10 (5), 430–435. https://doi.org/10.1016/j.cmet.2009.10.002.	59
Yen, K.; Le, T. T.; Bansal, A.; Narasimhan, S. D.; Cheng, J.-X.; Tissenbaum, H. A. A Comparative Study of Fat Storage Quantitation in Nematode Caenorhabditis Elegans Using Label and Label-Free Methods. PLoS One 2010, 5 (9), e12810. https://doi.org/10.1371/journal.pone.0012810.	60
B. Dong, Y. Lu, N. Zhang, W. Song and W. Lin, Anal. Chem., 2019, 91, 5513–5516.	61
Y. Tang, A. Xu, Y. Ma, G. Xu, S. Gao and W. Lin, Sci. Rep., 2017, 7, 12944.	62
S. Xu, H.-W. Liu, X.-X. Hu, S.-Y. Huan, J. Zhang, Y.-C. Liu, L. Yuan, F.-L. Qu, X.-B. Zhang and W. Tan, Anal. Chem., 2017, 89, 7641–7648.	63
J. Yin, W. Quan, X. Kong, C. Liu, B. Lu and W. Lin, ACS Appl. Bio Mater., 2021, 4, 3630–3638. https://doi.org/10.1021/acsabm.1c00130	64
H. Xiao, R. Zhang, C. Wu, P. Li, W. Zhang and B. Tang, Sens. Actuators, B, 2018, 273, 1754–1761.	65
S.-J. Li, D.-Y. Zhou, Y. Li, H.-W. Liu, P. Wu, J. Ou-Yang, W.-L. Jiang and C.-Y. Li, ACS Sens., 2018, 3, 2311–2319. https://doi.org/10.1021/acssensors.8b00567	66
W. Song, B. Dong, Y. Lu, X. Kong, A. H. Mehmood and W. Lin, New J. Chem., 2019, 43, 12103–12108.	67
H. Xiao, P. Li, X. Hu, X. Shi, W. Zhang and B. Tang, Chem. Sci., 2016, 7, 6153–6159. https://doi.org/10.1039/C6SC01793B	68
T. Yang, J. Sun, W. Yao and F. Gao, Dyes Pigm., 2020, 180, 108435.	69
Q. Zuo, Q. Wu, Y. Lv, X. Gong and D. Cheng, New J. Chem., 2020, 44, 5457–5462.	70
A. H. Mehmood, B. Dong, Y. Lu, W. Song, Y. Sun and W. Lin, Anal. Methods, 2021, 13, 2204–2208. https://doi.org/10.1039/D0AY00443J	71
C. S. Wijesooriya, M. Nieszala, A. Stafford, J. R. Zimmerman and E. A. Smith, Photochem. Photobiol., 2019, 95, 556–562.	73
R. I. Benhamou, Q. Z. Jaber, I. M. Herzog, Y. Roichman and M. Fridman, ACS Chem. Biol., 2018, 13, 3325–3332.	74
N. Wagner, M. Stephan, D. Ho¨glinger and A. Nadler, Angew. Chem., Int. Ed., 2018, 57, 13339–13343.	75
A. R. Sekhar, B. Mallik, V. Kumar and J. Sankar, Org. Biomol. Chem., 2019, 17, 3732–3736.	76
W. Chen, J. Shao, Y. Huang, E. Chen, M. Huang, F. Han, X. Liang and Y. Yu, Chem. Commun., 2019, 55, 7327–7330.	77
L. Wu, Y. Wang, M. Weber, L. Liu, A. C. Sedgwick, S. D. Bull, C. Huang and T. D. James, Chem. Commun., 2018, 54, 9953–9956.	79
D. I. Danylchuk, P.-H. Jouard and A. S. Klymchenko, J. Am. Chem. Soc., 2021, 143, 912–924.	80
H. Zhang, J. Fan, H. Dong, S. Zhang, W. Xu, J. Wang, P. Gao and X. Peng, J. Mater. Chem. B, 2013, 1, 5450–5455.	81
W. Hakamata, A. Machida, T. Oku and T. Nishio, Bioorg. Med. Chem. Lett., 2011, 21, 3206–3209. DOI: 10.1016/j.bmcl.2011.04.066	82
S. Phaniraj, Z. Gao, D. Rane and B. R. Peterson, Dyes Pigm., 2016, 135, 127–133.	83
G. Guizzunti, T.P. Brady, V. Malhotra, E.A. Theodorakis, Bioorg. Med. Chem. Lett. 17 (2007) 320–325.	84
H. Zhang, J.L. Fan, J.Y. Wang, S.Z. Zhang, B. Dou, X.J. Peng, J. Am. Chem. Soc. 135 (2013) 11663–11669.	85
B.H. Wang, J.L. Fan, X.W. Wang, H. Zhu, J.Y. Wang, H.Y. Mua, X.J. Peng, Chem. Commun. 51 (2015) 792–795.	86
H. Wang, Z.H. He, Y.Y. Yang, J. Zhang, W. Zhang, W. Zhang, P. Li, B. Tang, Chem. Sci. 10 (2019) 10876–10880.	87
H. Wang, Y.Y. Yang, F. Huang, Z.X. He, P. Li, W. Zhang, W. Zhang, B. Tang, Anal. Chem. 92 (2020) 3103–3110.	88
H. Wang, M.Y. Dong, H.T. Wang, F. Huang, P. Li, W. Zhang, W. Zhang, B. Tang, Chem. Commun. 57 (2021) 5838–5841.	89
H.C. Zhu, C.Y. Liu, C.X. Liang, B. Tian, H.M. Zhang, X. Zhang, W.L. Sheng, Y.M. Yu, S.Y. Huang, B.C. Zhu, Chem. Commun. 56 (2020) 4086–4089.	90
M.M. Fortibui, W. Lim, S. Lee, S. Park, J. Kim, Molecules 26 (2021) 4980.	91
K.H. Jung, E.T. Oh, H.J. Park, K.H. Lee, Biosens. Bioelectron. 85 (2016) 437–444.	92
W. Zhang, J. Zhang, P. Li, J.H. Liu, D. Su, B. Tang, Chem. Sci. 10 (2019) 879–883.	93
P. Li, X.M. Guo, X.Y. Bai, X. Wang, Q. Ding, W. Zhang, W. Zhang, B. Tang, Anal. Chem. 91 (2019) 3382–3388.	94
L. Fang, R.C. Otero, C.R. Jones, M. Watkinson, Sensor. Actuat. B-Chem. 338 (2021) 129850.	95
F.F. Xue, Y. Wen, P. Wei, Y.L. Gao, Z.G. Zhou, S.Z. Xiao, T. Yi, Chem. Commun. 53 (2017) 6424–6427.	96
L. Fan, X.D. Wang, J.Y. Ge, F. Li, C.H. Zhang, B. Lin, S.M. Shuang, C. Dong, Chem. Commun. 55 (2019) 6685–6688.	97
J.H. Chen, H.J. Liu, L. Yang, J. Jiang, G.Q. Bi, G.Q. Zhang, G.S. Li, X.F. Chen, ACS Med. Chem. Lett. 10 (2019) 954–959.	98
H.C. Zhu, C.X. Liang, X.Y. Cai, H.M. Zhang, C.Y. Liu, P. Jia, Z.L. Li, Y.M. Yu, X. Zhang, W.L. Sheng, B.C. Zhu, Anal. Chem. 92 (2020) 1883–1889.	99
X. Zhang, C.Y. Liu, X.Y. Cai, B. Tian, H.C. Zhu, Y.N. Chen, W.L. Sheng, P. Jia, Z.L. Li, Y.M. Yu, S.Y. Huang, B.C. Zhu, Sensor. Actuat. B-Chem. 310 (2020) 127829. https://doi.org/10.1016/j.snb.2020.127820.	100
X. Zhang, C.Y. Liu, Y.N. Chen, X.Y. Cai, W.Y. Sheng, H.C. Zhu, P. Jia, Z.L. Li, S.Y. Huang, B.C. Zhu, Chem. Commun. 56 (2020) 1807–1810.	101
X.D. Rong, C.Y. Liu, M.Z. Li, H.C. Zhu, Y. Zhang, M.J. Su, X. Wang, X.W. Li, K. Wang, M.H. Yu, W.L. Sheng, B.C. Zhu, Anal. Chem. 93 (2021) 16105–16112.	102
Z.P. Zheng, S.M. Feng, S.Y. Gong, G.Q. Feng, Sensor. Actuat. B-Chem. 347 (2021) 130631.	103
T. Kowada, T. Watanabe, Y. Amagai, R. Liu, M. Yamada, H. Takahashi, T. Matsui, K. Inaba, S. Mizukami, Cell Chem. Bio. 27 (2020) 1521–1531.	104
F. Ali, S. Aute, S. Sreedharan, H.A. Anila, H.K. Saeed, C.G. Smythe, J.A. Thomas, A. Das, Chem. Commun. 54 (2018) 1849–1852.	105
X.Y. Xing, Y. Jia, J.R. Zhang, Z.B. Wu, M.M. Qin, P. Li, X. Feng, Y. Sun, G.J. Zhao, Sensor. Actuat. B-Chem. 329 (2021) 129245.	106
Q. Zhang, D.D. Bu, H.H. Ren, M.M. Yu, H.Y. Zhang, Z.X. Li, Dyes Pigments 196 (2021) 109753.	107
Liu, X.; Yamazaki, T.; Kwon, H.-Y.; Arai, S.; Chang, Y.-T. A Palette of Site-Specific Organelle Fluorescent Thermometers. Materials Today Bio 2022, 16, 100405. https://doi.org/10.1016/j.mtbio.2022.100405	108
