# Supplementary material
Source: MDPI journal article supplement (https://www.mdpi.com/2227-9040/11/5/310)
Supplement: s1 [file s1 › SI_proofread_rev.pdf]

## Supporting Information

### Quantitative structure-activity relationship of fluorescent probes and their intracellular localizations

Seong-Hyeon Park<sup>1†</sup>, Hong-Guen Lee<sup>1†</sup>, Xiao Liu<sup>1</sup>, Sung Kwang Lee<sup>2\*</sup> and Young-Tae Chang<sup>1\*</sup>

<sup>1</sup> *Department of Chemistry, Pohang University of Science and Technology (POSTECH), Pohang 37673, Re-public of Korea*

<sup>2</sup> *Department of Chemistry, Hannam University, Daejeon, 34054, Republic of Korea*

<sup>†</sup> *These authors have contributed equally to this work.*

<sup>\*</sup> *Correspondence: ytchang@postech.ac.kr*

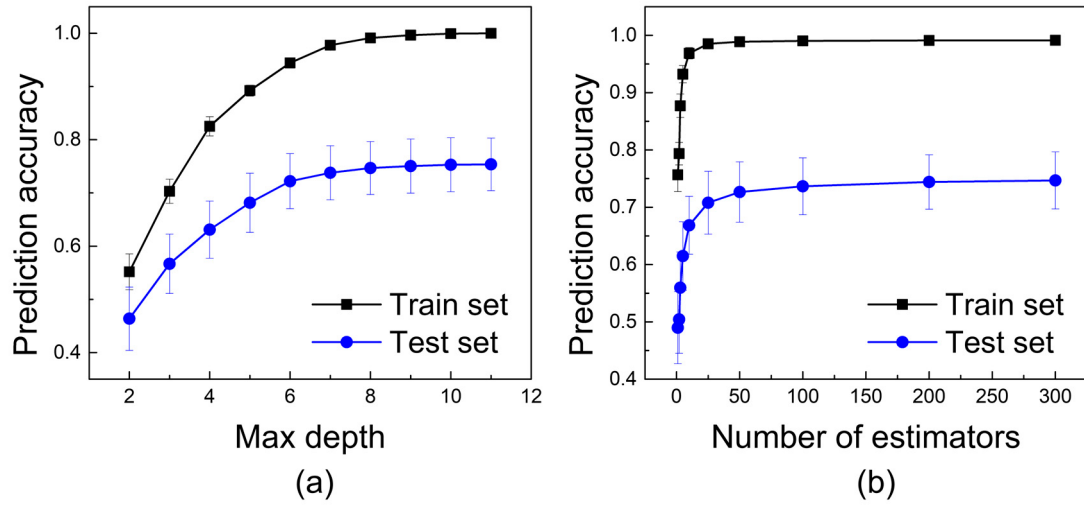

**Figure S1.** The increase of prediction accuracy along with the increasing number of (a) max depths and (b) estimators.

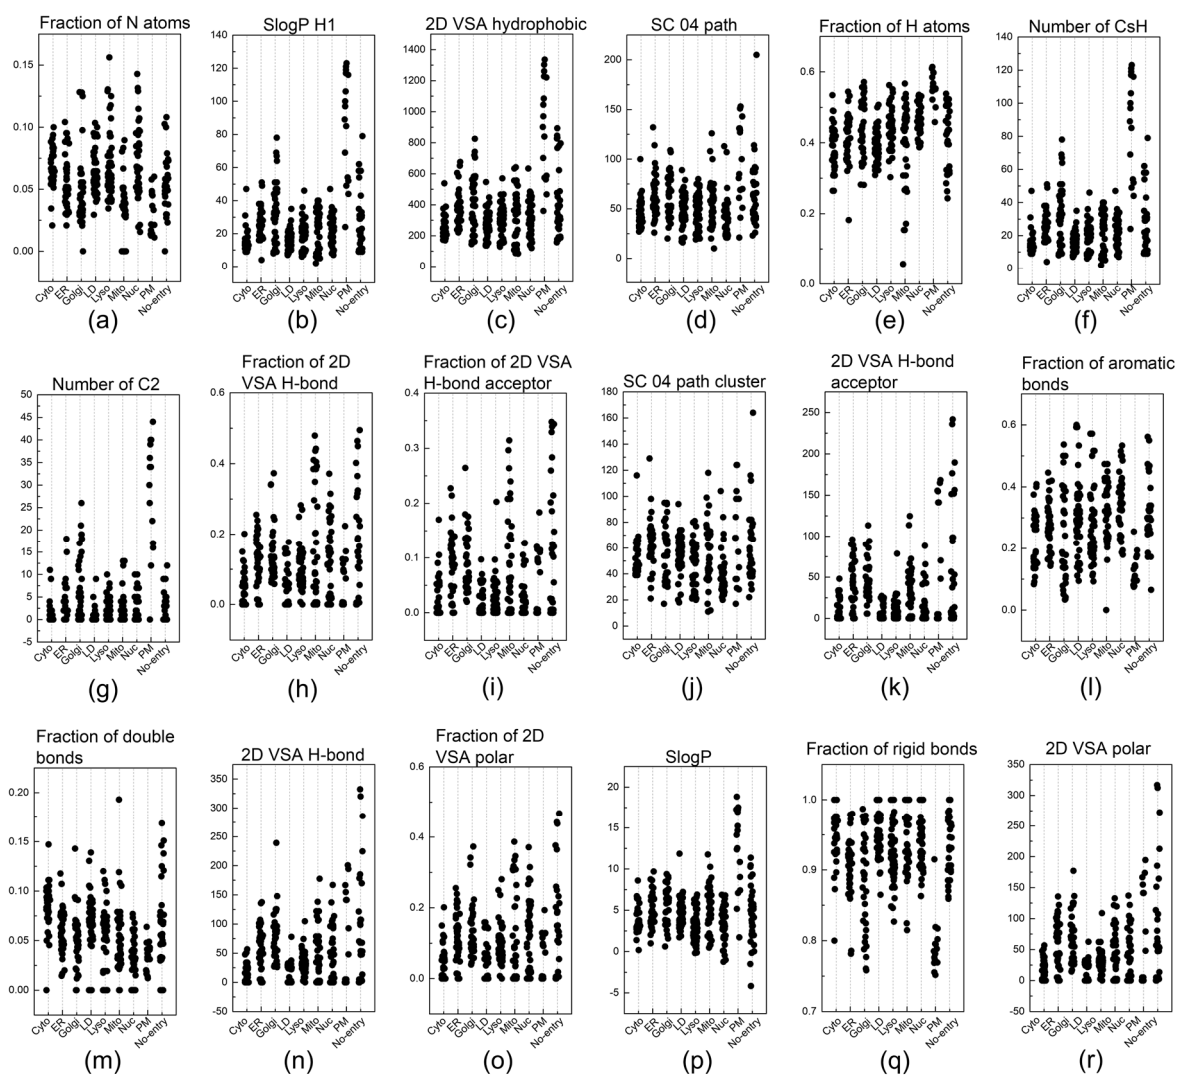

**Figure S2.** 18 descriptors among 38 key descriptors which are not included in Figure 3.

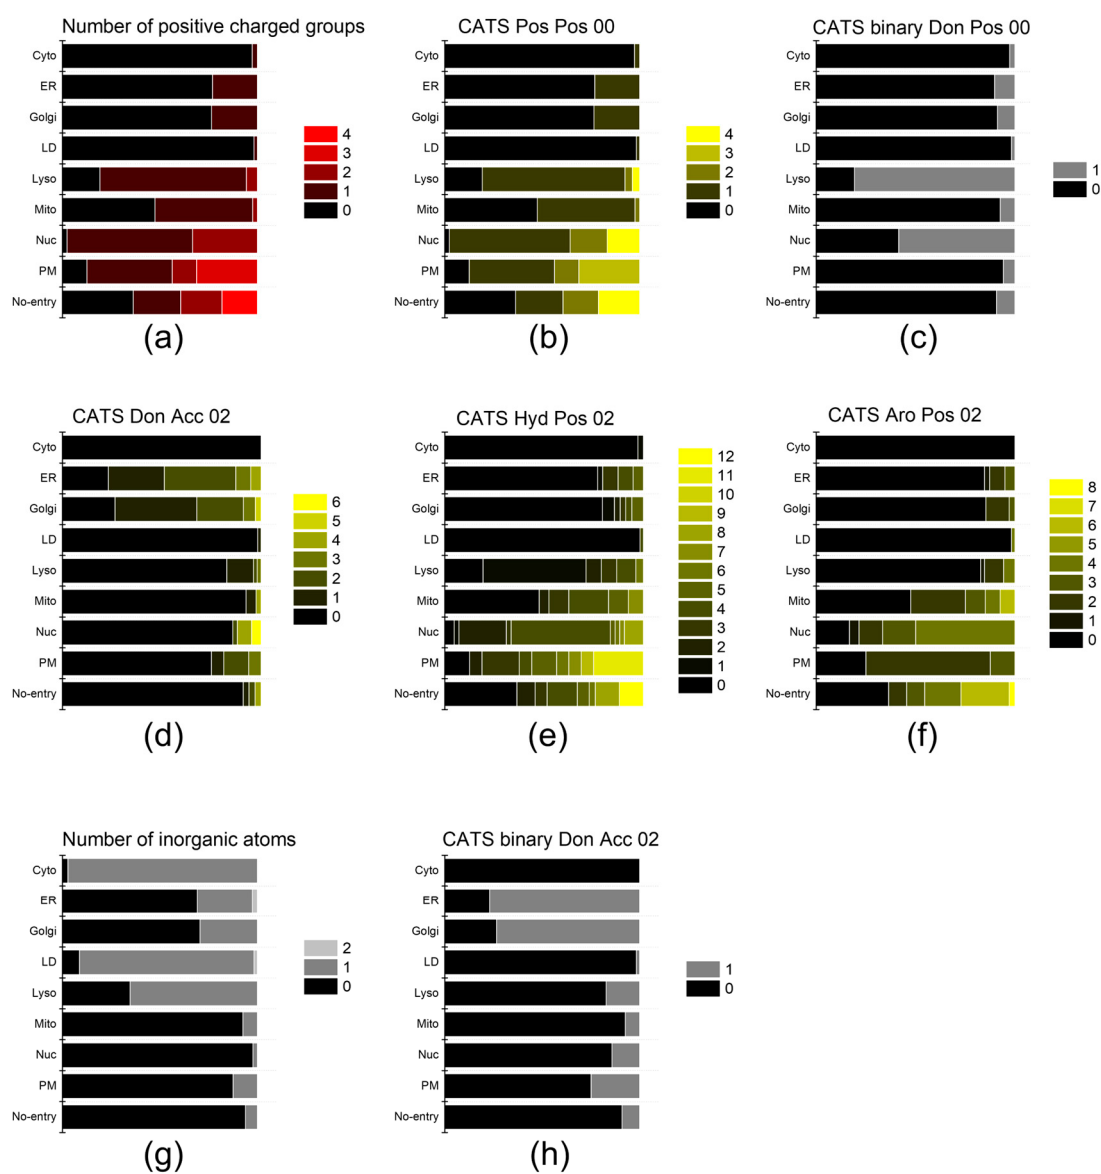

**Figure S3.** 8 descriptors among 38 key descriptors which are not included in Figure 4.
